# Supplementary material for: Multi-Omics Analysis of the Mechanism of Mentha Haplocalyx Briq on the Growth and Metabolic Regulation of Fattening Sheep
Source: MDPI journal article supplement (doi:10.3390/ani13223461), 2023-11-09
Supplement: s1 [file s1]

## Supplementary Materials

**Table S1.** Main components of the diet for fattening sheep during the experimental period.

| Item                                      | CON   | MHB   |
|-------------------------------------------|-------|-------|
| Ingredient (%)                            |       |       |
| Ground corn grain                         | 28.00 | 25.76 |
| Soybean meal                              | 15.00 | 13.80 |
| Rapeseed Meal                             | 9.00  | 8.28  |
| Wheat bran                                | 4.00  | 3.68  |
| Sodium bicarbonate                        | 1.00  | 0.92  |
| Salt                                      | 1.00  | 0.92  |
| Dicalcium phosphate                       | 0.50  | 0.46  |
| Calcium carbonate                         | 0.50  | 0.46  |
| Premix <sup>1</sup>                       | 1.00  | 0.92  |
| Mentha haplocalyx Briq.                   | 0.00  | 8.00  |
| Peanut straw                              | 15.00 | 13.80 |
| Soybean straw                             | 25.00 | 23.00 |
| Chemical composition (%)                  |       |       |
| CP                                        | 15.10 | 14.28 |
| NDF                                       | 38.70 | 39.27 |
| ADF                                       | 23.20 | 24.16 |
| Ether extract                             | 3.10  | 2.97  |
| Calcium                                   | 0.75  | 0.69  |
| Phosphorus                                | 0.43  | 0.39  |
| Metabolizable energy <sup>2</sup> , MJ/Kg | 9.83  | 9.72  |

Abbreviations: CON = control diet; MHB = mentha haplocalyx briq.

<sup>1</sup> Formulated to provide (per kilogram of premix) 600 KIU of Vitamin A, 80 KIU of vitamin D3, 5 000 IU of Vitamin E, 8 000 mg of Zn, 60 mg of Se, 200 mg of I, 9 400 mg of Fe, 72 mg of Co, 10400 mg of Mn, and 1 600 mg of Cu.

<sup>2</sup> Calculated according to Ministry of Agriculture of P.R. China, 2004.

**Table S2.** Classification composition of rumen level microbiota in fattening sheep.

| <b>Bacteria</b>                               | <b>MHB-1</b> | <b>MHB-2</b> | <b>MHB-3</b> | <b>MHB-4</b> | <b>MHB-5</b> | <b>MHB-6</b> | <b>CON-1</b> | <b>CON-2</b> | <b>CON-3</b> | <b>CON-4</b> | <b>CON-5</b> | <b>CON-6</b> | <b>Average</b> | <b>SD</b> |
|-----------------------------------------------|--------------|--------------|--------------|--------------|--------------|--------------|--------------|--------------|--------------|--------------|--------------|--------------|----------------|-----------|
| <i>Unclassified</i>                           | 43.05        | 45.24        | 33.37        | 45.39        | 54.18        | 46.89        | 42.86        | 42.09        | 41.43        | 52.01        | 54.28        | 50.63        | 45.95          | 6.098     |
| <i>Prevotella</i>                             | 32.72        | 27.86        | 34.39        | 24.04        | 19.63        | 29.85        | 33.91        | 28.62        | 31.75        | 26.34        | 20.12        | 29.01        | 28.19          | 4.928     |
| <i>Methanobrevibacter</i>                     | 1.76         | 3.49         | 15.25        | 6.79         | 7.72         | 4.83         | 5.45         | 5.9          | 3.75         | 4.01         | 8.04         | 3.34         | 5.86           | 3.505     |
| <i>Succinoclasticum</i>                       | 8.48         | 6.13         | 0.92         | 4.56         | 2.77         | 3.43         | 4.13         | 2.95         | 11.59        | 1.79         | 2.08         | 4.11         | 4.41           | 3.038     |
| <i>Clostridium IV</i>                         | 0.64         | 0.87         | 1.32         | 6.49         | 2.21         | 3.58         | 1.24         | 1.66         | 0.2          | 4.1          | 2.38         | 0.66         | 2.11           | 1.820     |
| <i>Selenomonas</i>                            | 1.86         | 1.26         | 0.59         | 0.88         | 0.88         | 2.03         | 3.31         | 2.71         | 0.12         | 2.07         | 0.49         | 1.1          | 1.44           | 0.962     |
| <i>Paraprevotella</i>                         | 1.43         | 0.51         | 0.81         | 2.1          | 2.45         | 0.7          | 0.35         | 0.97         | 0.43         | 0.65         | 0.99         | 0.86         | 1.02           | 0.657     |
| <i>Butyrivibrio</i>                           | 0.92         | 1.49         | 0.47         | 0.1          | 0.67         | 0.33         | 1.71         | 0.68         | 0.55         | 1.13         | 1.51         | 0.99         | 0.88           | 0.505     |
| <i>Barnesiella</i>                            | 0.46         | 0.81         | 1.17         | 0.6          | 0.21         | 0.36         | 0.37         | 0.9          | 0.03         | 0.78         | 3.29         | 0.98         | 0.83           | 0.844     |
| <i>Ruminococcus</i>                           | 0.41         | 0.49         | 0.12         | 2.81         | 0.25         | 0.2          | 0.63         | 4.72         | 1.25         | 0.24         | 0.74         | 0.3          | 1.01           | 1.383     |
| <i>Centipeda</i>                              | 2.38         | 0.53         | 0.81         | 0.16         | 0.77         | 0.66         | 0.27         | 1.3          | 0            | 0.74         | 0.12         | 0.25         | 0.67           | 0.655     |
| <i>Anaeroplasma</i>                           | 0.77         | 1.03         | 0.41         | 0.24         | 0.96         | 0.85         | 0.8          | 0.21         | 0.04         | 0.48         | 0.62         | 0.45         | 0.57           | 0.317     |
| <i>Acetobacteroides</i>                       | 0.01         | 1.37         | 2.53         | 0.04         | 0.28         | 0.05         | 0.08         | 2.78         | 0            | 0.35         | 0.02         | 0            | 0.63           | 1.023     |
| <i>Bifidobacterium</i>                        | 0.19         | 0            | 2.28         | 0            | 0.17         | 2.5          | 0            | 0.01         | 0.73         | 0.23         | 0.27         | 0            | 0.53           | 0.893     |
| <i>Treponema</i>                              | 0.31         | 0.57         | 0.39         | 1.58         | 0.27         | 0.72         | 0.21         | 0.66         | 0.9          | 0.11         | 0.55         | 0.23         | 0.54           | 0.404     |
| <i>Sporobacter</i>                            | 0.24         | 0.38         | 0.48         | 0.09         | 0.98         | 0.25         | 0.26         | 0.33         | 0.23         | 0.07         | 0.17         | 1.45         | 0.41           | 0.405     |
| <i>Oscillibacter</i>                          | 0.11         | 1.22         | 0.02         | 0.44         | 0.06         | 0.03         | 0.05         | 0.02         | 0            | 0.01         | 0.03         | 1.66         | 0.30           | 0.552     |
| <i>Saccharofermentans</i>                     | 0.37         | 0.33         | 0.18         | 0.55         | 0.52         | 0.06         | 0.27         | 0.11         | 0.42         | 0.34         | 0.38         | 0.43         | 0.33           | 0.152     |
| <i>Pseudobutyrvibrio</i>                      | 0.04         | 1.04         | 0.35         | 0.2          | 0.17         | 0.04         | 0.18         | 0.09         | 0.05         | 0.05         | 0.23         | 0.51         | 0.25           | 0.288     |
| <i>Stomatobaculum</i>                         | 0.47         | 0.16         | 0.1          | 0.12         | 0.19         | 0.42         | 0.1          | 0.13         | 0.5          | 0.12         | 0.21         | 0.1          | 0.22           | 0.153     |
| <i>Saccharibacteria_genera_incertae_sedis</i> | 0.56         | 0.37         | 0.21         | 0.07         | 0.43         | 0.06         | 0.23         | 0.16         | 0.03         | 0.05         | 0.11         | 0.08         | 0.20           | 0.172     |
| <i>Fibrobacter</i>                            | 0.41         | 0.1          | 0.15         | 0.02         | 0.25         | 0.02         | 0.49         | 0.48         | 0.01         | 0            | 0.19         | 0.16         | 0.19           | 0.182     |
| <i>Roseburia</i>                              | 0.04         | 0.04         | 1.22         | 0.01         | 0.18         | 0.03         | 0.06         | 0.02         | 0.03         | 0.5          | 0.01         | 0.01         | 0.18           | 0.356     |

[illegible]

|                                 |      |      |      |      |      |      |      |      |      |      |      |      |      |       |
|---------------------------------|------|------|------|------|------|------|------|------|------|------|------|------|------|-------|
| <i>Sphaerochaeta</i>            | 0.02 | 0    | 0.02 | 0.48 | 0.02 | 0.02 | 0.01 | 0.03 | 0.01 | 0    | 0.01 | 0.01 | 0.05 | 0.135 |
| <i>Bacteroides</i>              | 0.01 | 0.08 | 0.01 | 0.03 | 0.01 | 0.03 | 0.08 | 0.04 | 0.2  | 0.04 | 0.01 | 0.02 | 0.05 | 0.054 |
| <i>Hydrogenoanaerobacterium</i> | 0    | 0.02 | 0    | 0    | 0.35 | 0    | 0.01 | 0    | 0    | 0    | 0    | 0    | 0.03 | 0.100 |
| <i>Lachnobacterium</i>          | 0    | 0.2  | 0.01 | 0    | 0    | 0    | 0    | 0.02 | 0.06 | 0    | 0    | 0.12 | 0.03 | 0.064 |
| <i>Methanospaera</i>            | 0.04 | 0.05 | 0.04 | 0.06 | 0.04 | 0.01 | 0.03 | 0.02 | 0.06 | 0.03 | 0.02 | 0.02 | 0.04 | 0.016 |
| <i>Clostridium XLVa</i>         | 0.02 | 0.26 | 0.01 | 0    | 0    | 0.01 | 0    | 0.01 | 0    | 0.01 | 0.01 | 0.03 | 0.03 | 0.073 |
| <i>Bulleidia</i>                | 0    | 0.03 | 0.03 | 0.03 | 0.12 | 0.03 | 0.01 | 0.02 | 0.01 | 0.01 | 0.04 | 0    | 0.03 | 0.032 |
| <i>Anaerobacterium</i>          | 0.07 | 0.15 | 0    | 0.02 | 0.01 | 0    | 0.03 | 0.01 | 0    | 0    | 0.03 | 0.02 | 0.03 | 0.043 |
| <i>Eubacterium</i>              | 0.07 | 0.06 | 0.01 | 0.02 | 0.01 | 0.02 | 0.01 | 0    | 0.09 | 0.01 | 0.02 | 0.04 | 0.03 | 0.029 |
| <i>Falsiporphyromonas</i>       | 0.01 | 0.01 | 0    | 0    | 0.01 | 0.01 | 0.01 | 0    | 0    | 0.21 | 0.01 | 0.08 | 0.03 | 0.061 |
| <i>Acinetobacter</i>            | 0.03 | 0.03 | 0.04 | 0.02 | 0.03 | 0.04 | 0.02 | 0.03 | 0.02 | 0.02 | 0.03 | 0.02 | 0.03 | 0.008 |
| <i>Howardella</i>               | 0.02 | 0.05 | 0.03 | 0.03 | 0.03 | 0.03 | 0.02 | 0.03 | 0.03 | 0.02 | 0.03 | 0.01 | 0.03 | 0.010 |
| <i>Methanomassiliicoccus</i>    | 0.02 | 0.01 | 0.03 | 0.01 | 0    | 0.05 | 0.01 | 0.03 | 0    | 0.02 | 0.02 | 0.02 | 0.02 | 0.014 |
| <i>Pseudobacteroides</i>        | 0.02 | 0.06 | 0.01 | 0    | 0    | 0    | 0.06 | 0.01 | 0    | 0.03 | 0    | 0.03 | 0.02 | 0.022 |
| <i>Pyramidobacter</i>           | 0.03 | 0.02 | 0.01 | 0    | 0.01 | 0.04 | 0.01 | 0.04 | 0.03 | 0.02 | 0.01 | 0.01 | 0.02 | 0.013 |
| <i>Faecalibacterium</i>         | 0.02 | 0.05 | 0    | 0.02 | 0.02 | 0.01 | 0.03 | 0.04 | 0.01 | 0.02 | 0    | 0    | 0.02 | 0.016 |
| <i>Dorea</i>                    | 0.01 | 0.01 | 0.01 | 0    | 0.02 | 0    | 0.01 | 0.01 | 0.02 | 0    | 0.05 | 0.04 | 0.02 | 0.016 |
| <i>Atopobium</i>                | 0    | 0.01 | 0.01 | 0.01 | 0.04 | 0.01 | 0.01 | 0.01 | 0.03 | 0.01 | 0.02 | 0.01 | 0.01 | 0.011 |
| <i>Flavonifractor</i>           | 0.06 | 0.01 | 0    | 0.05 | 0    | 0    | 0    | 0.02 | 0    | 0    | 0    | 0.01 | 0.01 | 0.021 |
| <i>Phocaeicola</i>              | 0.01 | 0    | 0.01 | 0.02 | 0.07 | 0.01 | 0.01 | 0.01 | 0    | 0.01 | 0    | 0    | 0.01 | 0.019 |
| <i>Suttonella</i>               | 0.03 | 0.04 | 0    | 0    | 0    | 0.02 | 0.01 | 0.01 | 0.03 | 0.02 | 0.01 | 0.01 | 0.02 | 0.013 |
| <i>Oribacterium</i>             | 0.11 | 0    | 0    | 0    | 0    | 0    | 0    | 0    | 0.02 | 0    | 0    | 0    | 0.01 | 0.032 |
| <i>Vampirovibrio</i>            | 0.01 | 0.01 | 0.01 | 0.07 | 0.01 | 0.02 | 0    | 0.01 | 0    | 0    | 0    | 0.01 | 0.01 | 0.019 |
| <i>Shuttleworthia</i>           | 0    | 0.02 | 0    | 0    | 0    | 0    | 0.01 | 0    | 0.03 | 0    | 0    | 0.05 | 0.01 | 0.016 |
| <i>Ruminococcus2</i>            | 0.05 | 0.01 | 0.01 | 0    | 0.01 | 0    | 0.01 | 0.01 | 0.01 | 0    | 0    | 0    | 0.01 | 0.014 |
| <i>Lachnoanaerobaculum</i>      | 0.01 | 0.01 | 0.01 | 0.01 | 0.02 | 0    | 0    | 0    | 0.01 | 0.01 | 0.02 | 0.01 | 0.01 | 0.007 |

|                                 |      |      |      |      |      |      |      |      |      |      |      |      |      |       |
|---------------------------------|------|------|------|------|------|------|------|------|------|------|------|------|------|-------|
| <i>Eisenbergiella</i>           | 0    | 0.01 | 0    | 0.11 | 0    | 0    | 0.01 | 0    | 0    | 0    | 0    | 0    | 0.01 | 0.031 |
| <i>Anaerobiospirillum</i>       | 0.03 | 0.01 | 0    | 0    | 0.03 | 0    | 0    | 0    | 0    | 0    | 0.02 | 0.01 | 0.01 | 0.012 |
| <i>Anaerocella</i>              | 0.02 | 0    | 0    | 0.01 | 0    | 0.01 | 0    | 0    | 0.04 | 0.01 | 0    | 0    | 0.01 | 0.012 |
| <i>Anaerosporeobacter</i>       | 0    | 0.02 | 0    | 0.01 | 0.02 | 0.01 | 0.01 | 0    | 0.01 | 0    | 0    | 0.01 | 0.01 | 0.008 |
| <i>Marvinbryantia</i>           | 0    | 0.01 | 0    | 0    | 0    | 0    | 0    | 0    | 0.08 | 0    | 0    | 0.01 | 0.01 | 0.023 |
| <i>Coproccoccus</i>             | 0.01 | 0    | 0    | 0.01 | 0.01 | 0.01 | 0    | 0    | 0.04 | 0    | 0.01 | 0    | 0.01 | 0.011 |
| <i>Streptococcus</i>            | 0    | 0.01 | 0.01 | 0.01 | 0    | 0.01 | 0.01 | 0    | 0    | 0.01 | 0.01 | 0    | 0.01 | 0.005 |
| <i>Campylobacter</i>            | 0    | 0.01 | 0    | 0    | 0    | 0.03 | 0.01 | 0    | 0    | 0    | 0    | 0    | 0.00 | 0.009 |
| <i>Gimesia</i>                  | 0    | 0    | 0    | 0    | 0.01 | 0    | 0.01 | 0.02 | 0    | 0.01 | 0    | 0.01 | 0.01 | 0.007 |
| <i>Mitsuokella</i>              | 0    | 0    | 0    | 0    | 0    | 0    | 0    | 0    | 0.05 | 0.02 | 0    | 0    | 0.01 | 0.015 |
| <i>Phascolarctobacterium</i>    | 0    | 0.01 | 0    | 0    | 0    | 0    | 0    | 0    | 0    | 0.02 | 0.01 | 0    | 0.00 | 0.007 |
| <i>Methylobacterium</i>         | 0    | 0    | 0.01 | 0.01 | 0.01 | 0.01 | 0    | 0    | 0    | 0    | 0    | 0    | 0.00 | 0.005 |
| <i>Aestuariispira</i>           | 0    | 0.01 | 0    | 0.04 | 0    | 0    | 0    | 0.01 | 0    | 0    | 0    | 0    | 0.01 | 0.012 |
| <i>Brachymonas</i>              | 0    | 0    | 0    | 0    | 0.01 | 0    | 0    | 0.01 | 0.01 | 0    | 0    | 0    | 0.00 | 0.005 |
| <i>Candidatus Endomicrobium</i> | 0    | 0.03 | 0    | 0    | 0    | 0    | 0    | 0    | 0    | 0    | 0    | 0    | 0.00 | 0.009 |
| <i>Denitrobacterium</i>         | 0    | 0    | 0    | 0    | 0    | 0    | 0    | 0    | 0.01 | 0.01 | 0.01 | 0    | 0.00 | 0.005 |
| <i>Alistipes</i>                | 0    | 0    | 0    | 0    | 0    | 0.01 | 0    | 0.02 | 0    | 0    | 0    | 0    | 0.00 | 0.006 |
| <i>Papillibacter</i>            | 0    | 0.01 | 0.01 | 0    | 0    | 0    | 0    | 0    | 0    | 0    | 0    | 0    | 0.00 | 0.004 |
| <i>Guggenheimella</i>           | 0    | 0    | 0    | 0    | 0    | 0    | 0    | 0    | 0.06 | 0    | 0    | 0    | 0.01 | 0.017 |
| <i>Pseudomonas</i>              | 0    | 0    | 0.01 | 0    | 0    | 0    | 0    | 0    | 0.01 | 0    | 0    | 0    | 0.00 | 0.004 |
| <i>Mannheimia</i>               | 0    | 0    | 0    | 0    | 0    | 0.01 | 0    | 0    | 0    | 0    | 0    | 0.01 | 0.00 | 0.004 |
| <i>Ralstonia</i>                | 0    | 0    | 0    | 0    | 0    | 0    | 0    | 0    | 0.01 | 0    | 0    | 0    | 0.00 | 0.003 |
| <i>Moraxella</i>                | 0    | 0    | 0.01 | 0    | 0    | 0    | 0    | 0    | 0    | 0    | 0    | 0    | 0.00 | 0.003 |
| <i>Bacillus</i>                 | 0    | 0.01 | 0    | 0    | 0    | 0    | 0    | 0    | 0.01 | 0    | 0    | 0    | 0.00 | 0.004 |
| <i>Rhizobium</i>                | 0    | 0    | 0    | 0    | 0    | 0    | 0.01 | 0    | 0    | 0    | 0    | 0    | 0.00 | 0.003 |
| <i>Enterorhabdus</i>            | 0    | 0    | 0    | 0    | 0    | 0    | 0    | 0    | 0    | 0    | 0.01 | 0    | 0.00 | 0.003 |

[illegible]

[illegible]

[illegible]



[illegible]

[illegible]

[illegible]

[illegible]

**Table S3.** Classification and composition of fecal microbiota in fattening sheep.

| Bacteria                              | MHB-1 | MHB-2 | MHB-3 | MHB-4 | MHB-5 | MHB-6 | CON-1 | CON-2 | CON-3 | CON-4 | CON-5 | CON-6 | Average | SD    |
|---------------------------------------|-------|-------|-------|-------|-------|-------|-------|-------|-------|-------|-------|-------|---------|-------|
| <i>unclassified</i>                   | 40.94 | 45.4  | 45.84 | 36.91 | 43.49 | 47.65 | 41.69 | 53.99 | 46.91 | 45.66 | 37.49 | 46.48 | 44.371  | 4.688 |
| <i>Sporobacter</i>                    | 12.57 | 10.05 | 7.49  | 7.04  | 5.77  | 7.28  | 14.18 | 8.95  | 8.34  | 5.97  | 10.98 | 8.14  | 8.897   | 2.600 |
| <i>Bacteroides</i>                    | 8.24  | 6.16  | 10.54 | 1.77  | 6.74  | 8.53  | 8.58  | 4.48  | 8.81  | 6.78  | 7.05  | 6.44  | 7.010   | 2.277 |
| <i>Treponema</i>                      | 3.14  | 2.78  | 3.46  | 11.88 | 8.45  | 3.03  | 2.86  | 2.12  | 4.8   | 1.36  | 3.58  | 2.9   | 4.197   | 2.996 |
| <i>Clostridium XIVa</i>               | 4.24  | 2.36  | 4.31  | 3.94  | 5.78  | 5.55  | 3.97  | 2.96  | 2.28  | 6.54  | 2.72  | 4.97  | 4.135   | 1.391 |
| <i>Alistipes</i>                      | 4.34  | 2.63  | 5.44  | 1.63  | 1.9   | 3.13  | 1.77  | 6.95  | 4.72  | 5.23  | 2.35  | 4.54  | 3.719   | 1.722 |
| <i>Ruminococcus</i>                   | 3.28  | 1.68  | 0.82  | 3.74  | 5.1   | 4.56  | 4.47  | 2.13  | 2.45  | 1.13  | 8.17  | 3.28  | 3.401   | 2.035 |
| <i>Succinivibrio</i>                  | 1.07  | 2.52  | 4.38  | 3.84  | 2.33  | 0.53  | 1.09  | 0.33  | 0.39  | 4.55  | 8.92  | 2.13  | 2.673   | 2.480 |
| <i>Clostridium IV</i>                 | 2.18  | 2.14  | 2.59  | 4.12  | 2.65  | 3.17  | 1.28  | 3.96  | 3.37  | 2.67  | 1.72  | 2.29  | 2.678   | 0.853 |
| <i>Prevotella</i>                     | 4.35  | 7.91  | 1.48  | 5.85  | 1.9   | 2.27  | 0.04  | 1.27  | 0.22  | 2.78  | 1.53  | 4.13  | 2.811   | 2.348 |
| <i>Oscillibacter</i>                  | 1.32  | 1.2   | 1.9   | 1.66  | 2.09  | 1.44  | 0.98  | 1.39  | 1.34  | 2.45  | 0.93  | 2.25  | 1.579   | 0.494 |
| <i>Phascolarctobacterium</i>          | 0.85  | 1.19  | 1.68  | 1.08  | 1.1   | 1.24  | 0.68  | 0.61  | 0.93  | 2.75  | 1.7   | 1.3   | 1.259   | 0.579 |
| <i>Methanobrevibacter</i>             | 1.53  | 2.84  | 0.69  | 0.97  | 0.88  | 0.32  | 1.38  | 1.42  | 0.44  | 0.41  | 0.94  | 1.66  | 1.123   | 0.706 |
| <i>Roseburia</i>                      | 1.16  | 1.05  | 0.39  | 1.04  | 1.09  | 0.47  | 1.99  | 1.02  | 1.01  | 0.45  | 1.35  | 0.61  | 0.969   | 0.451 |
| <i>Blautia</i>                        | 0.85  | 0.52  | 0.31  | 0.83  | 0.19  | 0.19  | 1.16  | 0.46  | 1.93  | 0.57  | 1.05  | 0.51  | 0.714   | 0.495 |
| <i>Coprobacter</i>                    | 0.3   | 1.29  | 0.39  | 1.57  | 0.43  | 0.32  | 1.57  | 0.12  | 0.76  | 1.39  | 0.11  | 0.39  | 0.720   | 0.571 |
| <i>Coprococcus</i>                    | 0.43  | 0.58  | 0.31  | 0.62  | 0.22  | 0.31  | 0.76  | 0.42  | 0.91  | 0.42  | 1.2   | 0.49  | 0.556   | 0.282 |
| <i>Akkermansia</i>                    | 0.07  | 0.01  | 0.27  | 0     | 0.03  | 1.86  | 0     | 2.24  | 0     | 1.23  | 0.01  | 1.81  | 0.628   | 0.885 |
| <i>Faecalibacterium</i>               | 1.16  | 0.04  | 0.13  | 0.77  | 0.16  | 0.47  | 0.75  | 0.18  | 0.78  | 0.11  | 0.97  | 0.31  | 0.486   | 0.384 |
| <i>Macellibacteroides</i>             | 1.01  | 0.4   | 0.43  | 0.53  | 0.25  | 0     | 1.15  | 0.17  | 0.93  | 0.25  | 0.64  | 0.01  | 0.481   | 0.384 |
| <i>Campylobacter</i>                  | 0.15  | 0.03  | 0.9   | 1.6   | 0.19  | 0.08  | 0.02  | 0.08  | 0.53  | 0.44  | 0.02  | 0.31  | 0.363   | 0.471 |
| <i>Parabacteroides</i>                | 0.18  | 0.25  | 0.28  | 0.11  | 0.64  | 0.05  | 0.34  | 0.3   | 0.85  | 0.27  | 0.81  | 0.15  | 0.353   | 0.267 |
| <i>Lachnospiraceae_incertae_sedis</i> | 0.31  | 0.4   | 0.14  | 0.3   | 0.45  | 1.79  | 0.45  | 0.22  | 0.25  | 0.16  | 0.27  | 0.1   | 0.403   | 0.451 |
| <i>Barnesiella</i>                    | 0.31  | 0.18  | 0     | 0.31  | 0.25  | 0     | 1.07  | 0.06  | 0.55  | 0.18  | 0.29  | 0.4   | 0.300   | 0.291 |

|                                           |      |      |      |      |      |      |      |      |      |      |      |      |       |       |
|-------------------------------------------|------|------|------|------|------|------|------|------|------|------|------|------|-------|-------|
| <i>Dorea</i>                              | 0.48 | 0.22 | 0.15 | 0.33 | 0.24 | 0.4  | 0.28 | 0.16 | 0.56 | 0.22 | 0.48 | 0.15 | 0.306 | 0.143 |
| <i>Intestinimonas</i>                     | 0.33 | 0.57 | 0.44 | 0.17 | 0.27 | 0.3  | 0.21 | 0.38 | 0.13 | 0.16 | 0.32 | 0.46 | 0.312 | 0.134 |
| <i>Paraprevotella</i>                     | 0.07 | 1.08 | 0    | 0.07 | 3.02 | 0    | 0.01 | 0.03 | 0.08 | 0.01 | 0.02 | 0.03 | 0.368 | 0.888 |
| <i>Anaerostipes</i>                       | 0.32 | 0.23 | 0.25 | 0.36 | 0.09 | 0.12 | 1.02 | 0.06 | 0.4  | 0.15 | 0.13 | 0.07 | 0.267 | 0.264 |
| <i>Clostridium XIVb</i>                   | 0.22 | 0.25 | 0.54 | 0.19 | 0.36 | 0.36 | 0.19 | 0.34 | 0.23 | 0.17 | 0.11 | 0.18 | 0.262 | 0.118 |
| <i>Papillibacter</i>                      | 0.26 | 0.4  | 0.12 | 0.21 | 0.39 | 0.16 | 0.18 | 0.53 | 0.14 | 0.24 | 0.25 | 0.28 | 0.263 | 0.122 |
| <i>Anaerophaga</i>                        | 0.23 | 0    | 0    | 0.84 | 0    | 0    | 0    | 0    | 0.59 | 0    | 0.81 | 0    | 0.206 | 0.338 |
| <i>Alloprevotella</i>                     | 0.01 | 0.59 | 0.03 | 0.92 | 0.11 | 0.01 | 0.11 | 0.01 | 0.42 | 0.27 | 0.27 | 0.1  | 0.238 | 0.282 |
| <i>Clostridium XVIII</i>                  | 0.27 | 0.31 | 0.37 | 0.22 | 0.15 | 0.05 | 0.56 | 0.24 | 0.08 | 0.18 | 0.2  | 0.1  | 0.228 | 0.141 |
| <i>Flavonifractor</i>                     | 0.12 | 0.25 | 0.23 | 0.08 | 0.37 | 0.36 | 0.5  | 0.11 | 0.16 | 0.06 | 0.24 | 0.1  | 0.215 | 0.137 |
| <i>Clostridium sensu stricto</i>          | 0.02 | 0.02 | 0.08 | 0.91 | 0.01 | 0.01 | 1.02 | 0    | 0.06 | 0.08 | 0.03 | 0.03 | 0.189 | 0.364 |
| <i>Anaerovibrio</i>                       | 0.13 | 0.05 | 0.37 | 0.22 | 0    | 0.09 | 0    | 0.15 | 0.29 | 0.42 | 0.23 | 0.35 | 0.192 | 0.145 |
| <i>Kandleria</i>                          | 0.17 | 0.18 | 0.13 | 0.08 | 0.04 | 0.69 | 0.16 | 0.09 | 0.29 | 0.02 | 0    | 0.07 | 0.160 | 0.185 |
| <i>Anaeroplasma</i>                       | 0.19 | 0.12 | 0.06 | 0.02 | 0.06 | 0.64 | 0.2  | 0    | 0.03 | 0.08 | 0.32 | 0.01 | 0.144 | 0.183 |
| <i>Ruminococcus2</i>                      | 0.09 | 0.09 | 0.18 | 0.07 | 0.13 | 0.22 | 0.04 | 0.09 | 0.29 | 0.1  | 0.05 | 0.03 | 0.115 | 0.078 |
| <i>Parasutterella</i>                     | 0.11 | 0.07 | 0.07 | 0.09 | 0.06 | 0.01 | 0.15 | 0.06 | 0.18 | 0.25 | 0.14 | 0.11 | 0.108 | 0.064 |
| <i>Hungatella</i>                         | 0.03 | 0.07 | 0.02 | 0.1  | 0.43 | 0.03 | 0.11 | 0.04 | 0.25 | 0.08 | 0.02 | 0.13 | 0.109 | 0.120 |
| <i>Pseudoflavonifractor</i>               | 0.14 | 0.14 | 0.09 | 0.05 | 0.07 | 0.22 | 0.09 | 0.08 | 0.03 | 0.18 | 0.09 | 0.16 | 0.112 | 0.056 |
| <i>Anaerotruncus</i>                      | 0.14 | 0.08 | 0.2  | 0.1  | 0.01 | 0.17 | 0.03 | 0.14 | 0.01 | 0.23 | 0.06 | 0.11 | 0.107 | 0.072 |
| <i>Fibrobacter</i>                        | 0.18 | 0    | 0    | 0.75 | 0.04 | 0.03 | 0    | 0.03 | 0.09 | 0    | 0    | 0    | 0.093 | 0.214 |
| <i>Desulfovibrio</i>                      | 0    | 0.12 | 0.02 | 0.13 | 0.1  | 0.05 | 0    | 0.03 | 0.15 | 0.29 | 0.12 | 0.15 | 0.097 | 0.083 |
| <i>Porphyromonas</i>                      | 0    | 0    | 0.1  | 0.09 | 0.03 | 0.06 | 0.12 | 0    | 0.32 | 0.23 | 0.03 | 0.06 | 0.087 | 0.098 |
| <i>Subdivision5_genera_incertae_sedis</i> | 0.03 | 0.18 | 0.54 | 0.03 | 0.03 | 0.08 | 0.03 | 0.06 | 0    | 0.08 | 0.02 | 0.02 | 0.092 | 0.149 |
| <i>Anaerobacterium</i>                    | 0.17 | 0    | 0    | 0.24 | 0.06 | 0.04 | 0.08 | 0.21 | 0.1  | 0.03 | 0.01 | 0.08 | 0.085 | 0.081 |
| <i>Erysipelotrichaceae_incertae_sedis</i> | 0.07 | 0.03 | 0.17 | 0.05 | 0.06 | 0.01 | 0.12 | 0.05 | 0.01 | 0.12 | 0.15 | 0.03 | 0.073 | 0.054 |
| <i>Clostridium III</i>                    | 0.09 | 0.08 | 0.05 | 0.04 | 0.07 | 0.2  | 0.08 | 0.05 | 0.03 | 0.31 | 0.01 | 0.03 | 0.087 | 0.085 |

|                                               |      |      |      |      |      |      |      |      |      |      |      |      |       |       |
|-----------------------------------------------|------|------|------|------|------|------|------|------|------|------|------|------|-------|-------|
| <i>Escherichia/Shigella</i>                   | 0.06 | 0.01 | 0    | 0    | 0    | 0.01 | 0.69 | 0    | 0.01 | 0.02 | 0.01 | 0    | 0.068 | 0.197 |
| <i>Mycoplasma</i>                             | 0.11 | 0.08 | 0.05 | 0    | 0.03 | 0.05 | 0.34 | 0.09 | 0.09 | 0.02 | 0.01 | 0.03 | 0.075 | 0.091 |
| <i>Butyrivibrio</i>                           | 0.11 | 0.08 | 0    | 0.02 | 0.33 | 0    | 0.18 | 0.01 | 0.02 | 0.13 | 0    | 0.07 | 0.079 | 0.099 |
| <i>Elusimicrobium</i>                         | 0.01 | 0.04 | 0.01 | 0.31 | 0.15 | 0.17 | 0    | 0    | 0.02 | 0.01 | 0    | 0.15 | 0.073 | 0.100 |
| <i>Butyricoccus</i>                           | 0.08 | 0.04 | 0.08 | 0.07 | 0.04 | 0.08 | 0.07 | 0.05 | 0.08 | 0.11 | 0.07 | 0.04 | 0.068 | 0.021 |
| <i>Bifidobacterium</i>                        | 0.44 | 0    | 0.1  | 0    | 0.01 | 0.1  | 0    | 0    | 0    | 0.19 | 0.02 | 0    | 0.072 | 0.131 |
| <i>Acetanaerobacterium</i>                    | 0.1  | 0.08 | 0.09 | 0.03 | 0.07 | 0.04 | 0.03 | 0.09 | 0.04 | 0.18 | 0.02 | 0.03 | 0.067 | 0.046 |
| <i>Mogibacterium</i>                          | 0.07 | 0.08 | 0.04 | 0.07 | 0.02 | 0.02 | 0.05 | 0.12 | 0.03 | 0.09 | 0.04 | 0.03 | 0.055 | 0.031 |
| <i>Saccharibacteria_genera_incertae_sedis</i> | 0.04 | 0    | 0.15 | 0.05 | 0.06 | 0.01 | 0.03 | 0.11 | 0.02 | 0.03 | 0.04 | 0.05 | 0.049 | 0.042 |
| <i>Lactonifactor</i>                          | 0    | 0.05 | 0    | 0.01 | 0.01 | 0    | 0.11 | 0    | 0.01 | 0.01 | 0.02 | 0.42 | 0.053 | 0.120 |
| <i>Butyricimonas</i>                          | 0.05 | 0.04 | 0.01 | 0.02 | 0.1  | 0.01 | 0.02 | 0.02 | 0.03 | 0.15 | 0.11 | 0.06 | 0.052 | 0.045 |
| <i>Ureaplasma</i>                             | 0.02 | 0    | 0.06 | 0.01 | 0.12 | 0.01 | 0.05 | 0.03 | 0.1  | 0.02 | 0.07 | 0.03 | 0.043 | 0.038 |
| <i>Ethanoligenens</i>                         | 0.09 | 0.06 | 0    | 0.04 | 0.11 | 0.04 | 0    | 0.07 | 0.05 | 0    | 0    | 0.11 | 0.048 | 0.042 |
| <i>Guggenheimella</i>                         | 0    | 0.03 | 0.04 | 0.05 | 0.02 | 0    | 0.1  | 0.12 | 0.05 | 0.04 | 0.01 | 0.01 | 0.039 | 0.038 |
| <i>Holdemania</i>                             | 0.02 | 0.04 | 0.06 | 0.02 | 0.02 | 0.05 | 0.08 | 0.03 | 0.03 | 0.01 | 0.04 | 0.02 | 0.035 | 0.020 |
| <i>Anaerovorax</i>                            | 0.02 | 0.05 | 0.06 | 0.04 | 0.03 | 0.09 | 0.01 | 0.04 | 0.02 | 0.05 | 0.01 | 0.04 | 0.038 | 0.023 |
| <i>Olsenella</i>                              | 0.02 | 0.02 | 0    | 0.03 | 0    | 0.05 | 0.02 | 0.02 | 0.09 | 0.1  | 0.02 | 0    | 0.031 | 0.033 |
| <i>Syntrophococcus</i>                        | 0.04 | 0.02 | 0.05 | 0.07 | 0.01 | 0.02 | 0.03 | 0.03 | 0    | 0.05 | 0.02 | 0.02 | 0.030 | 0.020 |
| <i>Lysinibacillus</i>                         | 0.22 | 0    | 0.02 | 0.01 | 0.01 | 0    | 0.04 | 0.02 | 0.01 | 0.01 | 0.01 | 0    | 0.029 | 0.061 |
| <i>Anaerococcus</i>                           | 0.01 | 0.01 | 0    | 0.03 | 0.01 | 0.05 | 0.06 | 0.02 | 0.05 | 0.06 | 0.01 | 0.01 | 0.027 | 0.022 |
| <i>Helicobacter</i>                           | 0    | 0.06 | 0    | 0    | 0.2  | 0.01 | 0    | 0    | 0.09 | 0    | 0    | 0    | 0.030 | 0.061 |
| <i>Anaerofilum</i>                            | 0    | 0.01 | 0.03 | 0.04 | 0.01 | 0.01 | 0.02 | 0.02 | 0.01 | 0.09 | 0.06 | 0    | 0.025 | 0.027 |
| <i>Coprobacillus</i>                          | 0.13 | 0.03 | 0    | 0.02 | 0    | 0    | 0    | 0    | 0.03 | 0    | 0.07 | 0.01 | 0.024 | 0.039 |
| <i>Pseudobacteroides</i>                      | 0    | 0    | 0.23 | 0    | 0    | 0.02 | 0    | 0    | 0    | 0.02 | 0    | 0.01 | 0.023 | 0.066 |
| <i>Methanospaera</i>                          | 0.03 | 0.06 | 0.02 | 0.02 | 0.01 | 0.02 | 0.02 | 0.04 | 0.01 | 0.04 | 0.03 | 0.02 | 0.027 | 0.014 |
| <i>Eisenbergiella</i>                         | 0.01 | 0    | 0.01 | 0.02 | 0.01 | 0.17 | 0.02 | 0    | 0.07 | 0.01 | 0    | 0    | 0.027 | 0.049 |

|                                 |      |      |      |      |      |      |      |      |      |      |      |      |       |       |
|---------------------------------|------|------|------|------|------|------|------|------|------|------|------|------|-------|-------|
| <i>Acinetobacter</i>            | 0.03 | 0.02 | 0.01 | 0.02 | 0    | 0.02 | 0.03 | 0.03 | 0.03 | 0.02 | 0.03 | 0.01 | 0.021 | 0.010 |
| <i>Defluviitalea</i>            | 0.03 | 0.01 | 0.02 | 0    | 0.04 | 0.06 | 0.01 | 0.01 | 0.04 | 0.02 | 0.03 | 0.01 | 0.023 | 0.017 |
| <i>Subdoligranulum</i>          | 0.08 | 0.04 | 0.03 | 0.01 | 0.01 | 0    | 0.03 | 0.02 | 0.01 | 0.02 | 0.01 | 0.02 | 0.023 | 0.021 |
| <i>Odoribacter</i>              | 0.04 | 0    | 0.08 | 0.01 | 0.01 | 0    | 0.02 | 0    | 0.01 | 0.03 | 0.02 | 0    | 0.018 | 0.023 |
| <i>Faecalicoccus</i>            | 0.06 | 0    | 0.04 | 0    | 0    | 0.02 | 0    | 0.02 | 0.02 | 0.02 | 0.02 | 0.03 | 0.019 | 0.018 |
| <i>Hespellia</i>                | 0    | 0    | 0    | 0.12 | 0.03 | 0    | 0.02 | 0    | 0.03 | 0    | 0    | 0    | 0.017 | 0.035 |
| <i>Faecalitalea</i>             | 0.05 | 0.04 | 0.02 | 0    | 0.01 | 0.02 | 0.02 | 0.02 | 0    | 0    | 0.04 | 0.01 | 0.019 | 0.017 |
| <i>Eubacterium</i>              | 0.01 | 0.01 | 0.01 | 0.06 | 0    | 0.04 | 0.02 | 0.01 | 0.01 | 0.02 | 0.01 | 0.01 | 0.018 | 0.017 |
| <i>Arcanobacterium</i>          | 0    | 0    | 0.01 | 0    | 0    | 0.01 | 0.02 | 0    | 0.11 | 0.01 | 0.01 | 0    | 0.014 | 0.031 |
| <i>Vampirovibrio</i>            | 0.01 | 0    | 0.04 | 0.04 | 0.01 | 0.02 | 0    | 0    | 0    | 0.01 | 0    | 0.05 | 0.015 | 0.018 |
| <i>Peptoniphilus</i>            | 0    | 0    | 0.01 | 0.02 | 0    | 0.01 | 0.06 | 0    | 0.02 | 0.01 | 0    | 0.02 | 0.013 | 0.017 |
| <i>Ruminobacter</i>             | 0    | 0    | 0    | 0    | 0    | 0    | 0    | 0    | 0    | 0.18 | 0    | 0    | 0.015 | 0.052 |
| <i>Schwartzia</i>               | 0    | 0    | 0    | 0    | 0.04 | 0    | 0    | 0    | 0    | 0.13 | 0    | 0    | 0.014 | 0.038 |
| <i>Lawsonia</i>                 | 0    | 0    | 0.06 | 0    | 0.02 | 0    | 0    | 0    | 0    | 0    | 0    | 0.07 | 0.013 | 0.025 |
| <i>Turicibacter</i>             | 0    | 0.01 | 0    | 0    | 0    | 0    | 0.05 | 0    | 0    | 0.01 | 0.06 | 0    | 0.011 | 0.021 |
| <i>Streptococcus</i>            | 0.02 | 0.01 | 0.02 | 0    | 0    | 0.01 | 0.04 | 0    | 0    | 0    | 0.02 | 0    | 0.010 | 0.013 |
| <i>Peptococcus</i>              | 0    | 0    | 0    | 0    | 0    | 0    | 0.01 | 0.01 | 0.01 | 0.09 | 0.01 | 0    | 0.011 | 0.025 |
| <i>Fusicatenibacter</i>         | 0.01 | 0    | 0.02 | 0    | 0    | 0.04 | 0.03 | 0    | 0    | 0    | 0.01 | 0.01 | 0.010 | 0.013 |
| <i>Gracilibacter</i>            | 0    | 0    | 0.01 | 0.01 | 0.02 | 0.06 | 0    | 0.02 | 0    | 0    | 0    | 0    | 0.010 | 0.018 |
| <i>Hydrogenoanaerobacterium</i> | 0.01 | 0.03 | 0.01 | 0.01 | 0.01 | 0.02 | 0    | 0    | 0.01 | 0    | 0    | 0.02 | 0.010 | 0.010 |
| <i>Anaerosporobacter</i>        | 0.01 | 0    | 0.02 | 0.01 | 0    | 0.02 | 0.01 | 0    | 0.01 | 0    | 0.01 | 0.01 | 0.008 | 0.007 |
| <i>Parvibacter</i>              | 0.02 | 0    | 0.01 | 0.02 | 0    | 0.01 | 0    | 0    | 0.02 | 0    | 0    | 0.01 | 0.008 | 0.009 |
| <i>Negativicoccus</i>           | 0    | 0    | 0    | 0    | 0    | 0    | 0.03 | 0    | 0.02 | 0.03 | 0    | 0.01 | 0.008 | 0.012 |
| <i>Aestuariispira</i>           | 0    | 0.01 | 0.01 | 0    | 0    | 0.04 | 0.01 | 0.03 | 0    | 0    | 0    | 0    | 0.008 | 0.013 |
| <i>Paraeggerthella</i>          | 0.01 | 0.02 | 0.01 | 0    | 0    | 0    | 0.01 | 0.01 | 0    | 0    | 0.01 | 0.01 | 0.007 | 0.007 |
| <i>Murdochella</i>              | 0    | 0    | 0    | 0    | 0    | 0    | 0.02 | 0.01 | 0.02 | 0.01 | 0.01 | 0    | 0.006 | 0.008 |



[illegible]

[illegible]

[illegible]

[illegible]

[illegible]

**Table S4.** Significant differences in metabolites of rumen fluid between MHB and CON groups in fattening sheep.

| Name                                        | MZ <sup>1</sup> | R.T <sup>2</sup> (min) | VIP <sup>3</sup> | <i>p</i> -Value <sup>4</sup> | FC <sup>5</sup> |
|---------------------------------------------|-----------------|------------------------|------------------|------------------------------|-----------------|
| <b>Negative</b>                             |                 |                        |                  |                              |                 |
| Phenol                                      | 93.036          | 38.397                 | 1.953            | 0.029                        | 1.459           |
| 5-Hydroxyhexanoic acid                      | 131.071         | 190.973                | 1.900            | 0.026                        | 1.242           |
| Salicylic acid                              | 137.025         | 38.421                 | 2.095            | 0.016                        | 1.521           |
| 3-Phenylpropanoic acid                      | 149.062         | 97.849                 | 2.315            | 0.016                        | 1.567           |
| p-Hydroxyphenylacetic acid                  | 151.040         | 171.694                | 2.169            | 0.008                        | 1.878           |
| L-Cysteinesulfinic acid                     | 152.002         | 68.174                 | 2.122            | 0.014                        | 1.322           |
| 3,4-Dihydroxybenzoate (Protocatechuic acid) | 154.028         | 24.435                 | 2.111            | 0.014                        | 1.635           |
| Monomethyl glutaric acid                    | 167.034         | 99.352                 | 1.782            | 0.021                        | 1.560           |
| Tropic acid                                 | 225.075         | 330.730                | 1.775            | 0.042                        | 1.362           |
| Deoxycytidine                               | 227.091         | 187.353                | 2.487            | 0.001                        | 1.538           |
| Quinaldic acid                              | 232.060         | 45.590                 | 1.708            | 0.037                        | 0.753           |
| Thymidine                                   | 241.083         | 101.869                | 1.777            | 0.046                        | 2.457           |
| (S)-Equol                                   | 241.086         | 38.454                 | 1.654            | 0.047                        | 0.766           |
| Nicotinamide                                | 243.086         | 103.757                | 2.466            | 0.001                        | 1.583           |
| 5'-Deoxyadenosine                           | 250.094         | 140.405                | 1.819            | 0.025                        | 2.264           |
| Daidzein                                    | 253.049         | 48.382                 | 2.420            | 0.004                        | 0.452           |
| cis-9-Palmitoleic acid                      | 253.215         | 45.161                 | 1.911            | 0.023                        | 1.400           |
| Primidone                                   | 255.057         | 26.923                 | 1.840            | 0.041                        | 1.219           |
| 2-Deoxy-D-glucose 6-phosphate               | 260.055         | 44.629                 | 1.739            | 0.036                        | 0.588           |
| Glycitein                                   | 283.060         | 43.281                 | 2.859            | 0.000                        | 7.728           |
| N4-Acetylcytidine                           | 284.088         | 158.201                | 2.067            | 0.009                        | 1.625           |

|                                          |         |         |       |       |        |
|------------------------------------------|---------|---------|-------|-------|--------|
| 12-Oxo-2,3-dinor-10,15-phytodienoic acid | 285.149 | 178.096 | 1.906 | 0.045 | 1.318  |
| Diosmetin                                | 299.054 | 44.096  | 2.809 | 0.000 | 5.562  |
| Picrotoxinin                             | 313.069 | 278.403 | 1.864 | 0.050 | 1.277  |
| 4-Hydroxycinnamic acid                   | 327.085 | 287.266 | 1.885 | 0.015 | 1.317  |
| 2-Amino-3-methoxy-benzoic acid           | 333.107 | 152.105 | 2.568 | 0.005 | 2.024  |
| Phenethicillin                           | 345.095 | 295.022 | 1.728 | 0.048 | 1.848  |
| Camptothecin                             | 347.110 | 319.794 | 2.461 | 0.027 | 10.014 |
| Temazepam                                | 359.075 | 45.125  | 1.706 | 0.039 | 0.692  |
| Cortisol 21-acetate                      | 403.210 | 44.232  | 1.645 | 0.015 | 1.674  |
| Pravastatin                              | 445.228 | 89.139  | 2.195 | 0.004 | 1.250  |
| Oleanolic acid                           | 455.349 | 41.661  | 2.525 | 0.000 | 8.303  |
| Hydrocortisone succinate                 | 499.167 | 100.898 | 1.943 | 0.037 | 2.000  |
| Diosmin                                  | 607.161 | 190.419 | 2.825 | 0.004 | 63.088 |
| <b>Positive</b>                          |         |         |       |       |        |
| Methyl acetoacetate                      | 99.044  | 43.653  | 1.451 | 0.048 | 1.466  |
| Methylmalonic acid                       | 119.035 | 140.575 | 1.774 | 0.011 | 1.974  |
| Ala-Ala                                  | 125.071 | 50.228  | 1.462 | 0.031 | 0.403  |
| Thymine                                  | 127.051 | 102.313 | 1.644 | 0.039 | 2.829  |
| 1,4-Dihydroxybenzene                     | 128.071 | 79.520  | 2.466 | 0.004 | 1.938  |
| Oxyquinoline                             | 146.061 | 66.681  | 2.008 | 0.016 | 1.289  |
| 2-Hydroxyadenine                         | 152.058 | 219.660 | 1.612 | 0.031 | 1.803  |
| DL-3-Hydroxybutyric acid                 | 168.065 | 311.955 | 2.051 | 0.005 | 0.793  |
| Arecoline                                | 173.132 | 47.812  | 1.748 | 0.030 | 1.247  |
| Ethyl hydrogen malonate                  | 174.076 | 101.712 | 1.851 | 0.017 | 1.362  |
| (Z)-4-Decen-1-ol                         | 179.143 | 178.522 | 1.991 | 0.014 | 1.379  |

|                               |         |         |       |       |       |
|-------------------------------|---------|---------|-------|-------|-------|
| Dacarbazine                   | 183.099 | 111.260 | 2.336 | 0.000 | 1.406 |
| 2-Hydroxyphenylacetic acid    | 194.081 | 312.105 | 1.998 | 0.007 | 1.240 |
| 4-Methoxycinnamic acid        | 196.098 | 357.102 | 1.731 | 0.019 | 0.874 |
| 3-Hydroxy-L-kynurenine        | 207.076 | 52.610  | 1.975 | 0.006 | 1.416 |
| Ibuprofen                     | 207.138 | 178.155 | 2.184 | 0.005 | 1.497 |
| Cuminaldehyde                 | 209.117 | 47.882  | 1.529 | 0.039 | 1.639 |
| Methyldopa                    | 212.091 | 392.963 | 1.956 | 0.007 | 0.716 |
| Diethyltoluamide              | 214.122 | 35.080  | 1.778 | 0.030 | 1.667 |
| Ala-Ser                       | 218.113 | 354.695 | 1.548 | 0.046 | 1.271 |
| Val-Gln                       | 228.131 | 336.220 | 1.833 | 0.012 | 1.693 |
| Desoxypeganine                | 233.128 | 194.622 | 1.496 | 0.036 | 1.453 |
| Nicorandil                    | 234.052 | 365.345 | 1.387 | 0.023 | 1.803 |
| Indoleacetic acid             | 236.091 | 345.116 | 2.047 | 0.005 | 1.327 |
| N-Formylmethionine            | 238.070 | 180.435 | 2.154 | 0.001 | 0.617 |
| Gly-Val                       | 238.116 | 296.570 | 1.677 | 0.032 | 1.458 |
| 2-Dehydro-3-deoxy-D-gluconate | 239.082 | 108.519 | 2.042 | 0.012 | 1.220 |
| 3-Hydroxydodecanoic acid      | 239.163 | 48.653  | 1.806 | 0.014 | 1.278 |
| 7,8-Dihydrobiopterin          | 240.108 | 81.820  | 1.991 | 0.007 | 4.966 |
| Thymidine                     | 243.097 | 102.313 | 1.863 | 0.010 | 2.516 |
| Ser-Pro                       | 244.128 | 302.649 | 2.161 | 0.011 | 2.052 |
| Deoxyadenosine                | 252.111 | 140.909 | 1.683 | 0.019 | 2.127 |
| Daidzein                      | 255.065 | 49.382  | 2.241 | 0.013 | 0.317 |
| Caffeine                      | 258.094 | 182.360 | 2.157 | 0.001 | 2.245 |
| Arg-Thr                       | 258.152 | 351.277 | 2.282 | 0.013 | 1.453 |
| Acadesine (Drug)              | 259.097 | 182.402 | 1.618 | 0.020 | 1.589 |
| Tetrahydro-L-biopterin        | 264.108 | 160.674 | 1.882 | 0.015 | 1.687 |



|                                   |         |         |       |       |        |
|-----------------------------------|---------|---------|-------|-------|--------|
| Indolelactic acid                 | 266.099 | 223.346 | 1.771 | 0.018 | 1.459  |
| Pro-Ser                           | 266.107 | 317.006 | 2.273 | 0.002 | 1.700  |
| Porphobilinogen                   | 268.123 | 336.068 | 1.887 | 0.028 | 1.471  |
| Glycitein                         | 285.075 | 43.463  | 2.551 | 0.000 | 7.006  |
| Pro-Glu                           | 286.139 | 286.877 | 1.536 | 0.036 | 1.417  |
| Etomidate                         | 286.150 | 199.050 | 1.809 | 0.014 | 1.606  |
| Pro-Gln                           | 288.089 | 337.523 | 1.602 | 0.022 | 0.590  |
| Terbutaline                       | 289.154 | 195.462 | 1.804 | 0.014 | 0.769  |
| Procaterol                        | 291.169 | 239.327 | 2.359 | 0.000 | 1.521  |
| Diosmetin                         | 301.070 | 44.517  | 2.613 | 0.000 | 36.418 |
| DL-.alpha.-Phenylglycine          | 303.133 | 48.615  | 2.490 | 0.000 | 1.766  |
| Eicosapentaenoic acid             | 303.230 | 47.812  | 1.830 | 0.027 | 1.241  |
| Arachidonic Acid (peroxide free)  | 305.246 | 45.318  | 1.623 | 0.034 | 1.514  |
| Phenylacetic acid                 | 311.065 | 37.475  | 1.653 | 0.035 | 1.270  |
| 1-Palmitoylglycerol               | 313.273 | 181.231 | 1.651 | 0.030 | 2.877  |
| Tyr-Val                           | 325.111 | 117.567 | 1.544 | 0.037 | 1.448  |
| Eicosapentaenoic Acid ethyl ester | 330.263 | 50.997  | 1.704 | 0.050 | 0.494  |
| Lys-Trp                           | 332.190 | 365.621 | 2.141 | 0.002 | 1.306  |
| Vincamine                         | 337.197 | 216.332 | 2.053 | 0.028 | 1.852  |
| Tyr-Asp                           | 338.131 | 313.025 | 1.613 | 0.026 | 1.508  |
| (-)-Usnic acid                    | 345.095 | 46.119  | 1.863 | 0.025 | 2.312  |
| Arg-Tyr                           | 360.169 | 38.334  | 2.093 | 0.010 | 1.454  |
| 5-Hydroxydopamine                 | 361.137 | 51.006  | 1.981 | 0.027 | 4.285  |
| Zotepine                          | 395.093 | 305.129 | 1.720 | 0.046 | 2.581  |
| Lithocholic acid                  | 399.287 | 35.143  | 1.832 | 0.007 | 1.459  |
| D-Mannitol                        | 403.113 | 156.891 | 1.787 | 0.016 | 1.309  |

|                        |         |         |       |       |        |
|------------------------|---------|---------|-------|-------|--------|
| RU-0211                | 408.249 | 194.079 | 1.393 | 0.040 | 1.683  |
| Dihydrotachysterol     | 421.344 | 34.151  | 1.713 | 0.040 | 1.222  |
| 6"-O-Acetyldaizin      | 423.116 | 50.422  | 1.662 | 0.048 | 1.438  |
| N-Acetyl-D-lactosamine | 428.122 | 46.245  | 1.808 | 0.034 | 1.230  |
| Enoxolone              | 453.333 | 48.639  | 1.842 | 0.029 | 1.227  |
| Deoxycytidine          | 455.188 | 199.028 | 1.823 | 0.028 | 2.560  |
| 25-Hydroxycholesterol  | 463.376 | 33.061  | 1.904 | 0.018 | 1.197  |
| Diosmin                | 609.177 | 190.777 | 2.562 | 0.005 | 38.191 |

<sup>1</sup>MZ = mass-to-charge ratio.

<sup>2</sup>R.T = represents retention time.

<sup>3</sup>VIP >1 and <sup>4</sup>Pvalue<0.05 are listed in the table. Pvalues were calculated according to Student's T-test (n=6).

<sup>5</sup>FC = fold change. If the fold change value is less than 1, it means that there is less metabolite in the MHB group than in the CON group.

**Table S5.** Pathway analysis of rumen fluid metabolomics in MHB and CON groups of fattening sheep.

| Pathway                                    | Total | Hits <sup>1</sup> | Raw p <sup>2</sup> | Impact <sup>3</sup> | Hits compounds                                                     |
|--------------------------------------------|-------|-------------------|--------------------|---------------------|--------------------------------------------------------------------|
| Pyrimidine metabolism                      | 37    | 3                 | 0.030              | 0.010               | Deoxycytidine cpd:C00881; Thymidine cpd:C00214; Thymine cpd:C00178 |
| Phenylalanine metabolism                   | 9     | 1                 | 0.157              | 0.000               | Ortho-Hydroxyphenylacetic acid cpd:C05852                          |
| Tryptophan metabolism                      | 41    | 2                 | 0.177              | 0.003               | L-3-Hydroxykynurenine cpd:C03227; Indoleacetic acid cpd:C00954     |
| Biosynthesis of unsaturated fatty acids    | 42    | 2                 | 0.184              | 0.000               | Arachidonic acid cpd:C00219; Eicosapentaenoic acid cpd:C06428      |
| Riboflavin metabolism                      | 11    | 1                 | 0.188              | 0.167               | Hydroquinone cpd:C00530                                            |
| Caffeine metabolism                        | 12    | 1                 | 0.203              | 0.000               | Caffeine cpd:C07481                                                |
| Porphyrin and chlorophyll metabolism       | 25    | 1                 | 0.379              | 0.042               | Porphobilinogen cpd:C00931                                         |
| Arachidonic acid metabolism                | 36    | 1                 | 0.497              | 0.326               | Arachidonic acid cpd:C00219                                        |
| Valine, leucine and isoleucine degradation | 38    | 1                 | 0.517              | 0.000               | Methylmalonic acid cpd:C02170                                      |
| Primary bile acid biosynthesis             | 46    | 1                 | 0.586              | 0.011               | 25-Hydroxycholesterol cpd:C15519                                   |
| Purine metabolism                          | 68    | 1                 | 0.732              | 0.005               | Deoxyadenosine cpd:C00559                                          |
| Taurine and hypotaurine metabolism         | 7     | 1                 | 0.078              | 0.250               | 3-Sulfinoalanine cpd:C00606                                        |
| Nicotinate and nicotinamide metabolism     | 13    | 1                 | 0.140              | 0.159               | Niacinamide cpd:C00153                                             |
| Cysteine and methionine metabolism         | 28    | 1                 | 0.279              | 0.023               | 3-Sulfinoalanine cpd:C00606                                        |
| Tyrosine metabolism                        | 42    | 1                 | 0.389              | 0.000               | p-Hydroxyphenylacetic acid cpd:C00642                              |

<sup>1</sup> Hits represent the number of significantly different ruminal metabolites matched in one pathway.

<sup>2</sup> P is the original *p*-Value obtained by pathway analysis.

<sup>3</sup> Impact is the influencing factor of the pathway obtained by topology analysis.

**Table S6.** Significant differences in metabolites between MHB group and CON group in serum of fattening sheep.

| Name                                  | MZ     | R.T(min) | VIP   | <i>p</i> -Value | FC    |
|---------------------------------------|--------|----------|-------|-----------------|-------|
| <b>Negative</b>                       |        |          |       |                 |       |
| Dihydrothymine                        | 187.07 | 372.27   | 1.972 | 0.000           | 0.276 |
| Allantoate/Allantoic acid             | 175.05 | 333.30   | 2.027 | 0.000           | 0.316 |
| Sucrose                               | 342.12 | 315.47   | 2.015 | 0.000           | 0.215 |
| 3,4-Methylenedioxyamphetamine (MDMA)  | 214.09 | 46.74    | 1.995 | 0.000           | 0.362 |
| 4-Nitrophenol                         | 138.02 | 38.01    | 1.711 | 0.000           | 0.500 |
| N4-Acetylcytidine                     | 284.09 | 158.48   | 1.968 | 0.000           | 3.248 |
| hydrocortisone 21-acetate             | 425.20 | 47.98    | 1.936 | 0.000           | 1.583 |
| 2-Deoxyribose 5-phosphate             | 273.04 | 23.37    | 1.992 | 0.001           | 2.902 |
| N-Formylmethionyl-Leucylphenylalanine | 436.20 | 294.12   | 1.645 | 0.001           | 0.271 |
| MK 571                                | 573.13 | 333.19   | 1.907 | 0.001           | 0.138 |
| Muramic acid                          | 250.09 | 352.87   | 1.987 | 0.001           | 0.325 |
| Phosphorylcholine                     | 242.08 | 373.43   | 1.750 | 0.001           | 0.658 |
| L-homocysteic acid                    | 204.00 | 32.80    | 1.873 | 0.001           | 1.716 |
| PS(16:0/16:0)                         | 734.52 | 49.68    | 1.930 | 0.001           | 0.317 |
| all cis-(6,9,12)-Linolenic acid       | 277.22 | 44.52    | 1.816 | 0.001           | 1.444 |
| Stavudine                             | 245.06 | 167.72   | 1.701 | 0.002           | 0.429 |
| Fludrocortisone acetate               | 403.19 | 259.11   | 1.808 | 0.003           | 1.765 |
| Arachidic acid                        | 311.29 | 40.77    | 1.711 | 0.003           | 1.401 |
| Glycerol                              | 92.05  | 176.40   | 1.628 | 0.004           | 0.581 |
| Glycerol 3-phosphate                  | 171.01 | 372.99   | 1.665 | 0.005           | 0.628 |
| (R)-mevalonic acid 5-Phosphate        | 265.09 | 26.22    | 2.025 | 0.005           | 3.131 |
| D-Sorbitol 6-phosphate                | 283.13 | 28.55    | 1.551 | 0.005           | 1.485 |
| D-Ribose 5-phosphate                  | 211.00 | 24.64    | 1.740 | 0.005           | 0.561 |

|                                                        |        |        |       |       |       |
|--------------------------------------------------------|--------|--------|-------|-------|-------|
| Undecanoic Acid                                        | 185.15 | 46.41  | 1.586 | 0.006 | 0.720 |
| Indoxyl sulfate                                        | 212.00 | 33.38  | 1.571 | 0.007 | 0.679 |
| Arachidonic Acid (peroxide free)                       | 303.23 | 43.09  | 1.655 | 0.007 | 0.764 |
| Beta-Alanine                                           | 177.09 | 48.39  | 1.619 | 0.007 | 0.512 |
| Formylanthranilic acid                                 | 164.03 | 68.88  | 1.649 | 0.008 | 0.527 |
| 5'-O-methylthymidine                                   | 256.10 | 144.42 | 2.008 | 0.008 | 0.106 |
| Aminohippuric acid                                     | 193.06 | 176.38 | 1.659 | 0.008 | 0.611 |
| Glucosamine                                            | 238.09 | 296.55 | 1.651 | 0.009 | 0.615 |
| Sedoheptulose                                          | 419.13 | 207.39 | 1.593 | 0.011 | 2.005 |
| Salsalate                                              | 317.06 | 147.48 | 1.414 | 0.011 | 0.713 |
| Topiramate                                             | 338.09 | 281.59 | 1.544 | 0.011 | 0.480 |
| Sepiapterin                                            | 296.10 | 218.32 | 1.501 | 0.014 | 0.843 |
| Acetylvalerenolic acid                                 | 308.18 | 46.73  | 1.541 | 0.015 | 0.717 |
| Maltitol                                               | 344.13 | 260.68 | 1.583 | 0.017 | 0.630 |
| Cysteinylglycine                                       | 194.06 | 176.35 | 1.425 | 0.017 | 0.633 |
| Hippuric acid                                          | 178.05 | 43.43  | 1.419 | 0.019 | 0.619 |
| Myristic acid                                          | 227.20 | 104.78 | 1.442 | 0.019 | 0.833 |
| alpha-hydroxy myristic acid                            | 243.20 | 103.29 | 1.623 | 0.021 | 0.537 |
| Lipoamide                                              | 221.08 | 47.50  | 1.675 | 0.022 | 0.221 |
| DL-3-Phenyllactic acid                                 | 147.04 | 106.11 | 1.408 | 0.022 | 0.549 |
| 2E-Eicosenoic acid                                     | 309.28 | 41.85  | 1.429 | 0.023 | 1.269 |
| 1-Palmitoyl-2-hydroxy-sn-glycero-3-phosphoethanolamine | 452.28 | 185.40 | 1.469 | 0.026 | 1.420 |
| N-Acetylneuraminic acid                                | 290.09 | 325.58 | 1.444 | 0.028 | 0.850 |
| Kynurenic acid                                         | 188.03 | 174.18 | 1.418 | 0.032 | 0.778 |
| 2'-O-methylinosine                                     | 281.09 | 143.85 | 1.398 | 0.037 | 1.234 |
| Confertifoline                                         | 233.15 | 30.74  | 1.096 | 0.039 | 2.198 |

|                                       |        |        |       |       |       |
|---------------------------------------|--------|--------|-------|-------|-------|
| N-Acetyl-L-aspartic acid              | 174.04 | 361.34 | 1.546 | 0.040 | 0.617 |
| Indoleacrylic acid                    | 186.06 | 29.33  | 1.746 | 0.042 | 3.224 |
| N-Acetyl-L-tyrosine                   | 222.08 | 204.06 | 1.369 | 0.044 | 0.649 |
| Citramalic acid                       | 207.05 | 287.75 | 1.419 | 0.047 | 1.637 |
| <b>Postive</b>                        |        |        |       |       |       |
| Val-Gln                               | 246.14 | 313.23 | 2.048 | 0.000 | 0.114 |
| DL-a-Hydroxybutyric acid              | 149.02 | 33.17  | 2.111 | 0.000 | 0.452 |
| Phe-Tyr                               | 328.14 | 280.88 | 2.024 | 0.000 | 0.226 |
| (-)-Medicarpin                        | 331.11 | 372.18 | 1.982 | 0.000 | 0.285 |
| Pyridostigmine cation                 | 204.09 | 252.60 | 2.016 | 0.000 | 0.345 |
| Phe-Cys                               | 310.13 | 281.00 | 2.002 | 0.000 | 0.326 |
| 3,4-Dihydroxyphenylacetic acid        | 186.07 | 252.61 | 2.032 | 0.000 | 0.374 |
| Tyr-Phe                               | 311.13 | 370.99 | 2.063 | 0.000 | 0.402 |
| beta-Hydroxybutyrate                  | 168.06 | 252.50 | 2.005 | 0.000 | 0.306 |
| Larixinic Acid                        | 144.06 | 252.80 | 1.970 | 0.000 | 0.257 |
| Phthalic acid Mono-2-ethylhexyl Ester | 279.16 | 33.25  | 2.130 | 0.000 | 0.438 |
| 1-Stearoyl-2-arachidonoyl-sn-glycerol | 627.53 | 46.64  | 2.183 | 0.000 | 0.090 |
| Phenoxybenzamine                      | 367.15 | 282.73 | 1.948 | 0.000 | 0.240 |
| Ile-Thr                               | 296.16 | 294.16 | 1.955 | 0.000 | 0.385 |
| Pro-Met                               | 310.11 | 409.32 | 1.984 | 0.000 | 0.343 |
| Val-Tyr                               | 280.14 | 313.22 | 1.938 | 0.000 | 0.276 |
| Ile-Ser                               | 282.14 | 313.20 | 1.947 | 0.000 | 0.446 |
| Visnadin                              | 353.13 | 293.86 | 2.008 | 0.000 | 0.282 |
| Arg-Cys                               | 338.15 | 393.08 | 1.982 | 0.000 | 0.326 |
| Famciclovir                           | 344.13 | 315.33 | 1.960 | 0.000 | 0.217 |
| 1-Aminocyclopropanecarboxylic acid    | 162.08 | 252.80 | 1.929 | 0.000 | 0.374 |

|                                     |        |        |       |       |        |
|-------------------------------------|--------|--------|-------|-------|--------|
| Enoxacin                            | 338.16 | 353.82 | 1.960 | 0.000 | 0.361  |
| His-Tyr                             | 318.13 | 410.89 | 1.896 | 0.000 | 0.486  |
| Arg-Tyr                             | 337.17 | 450.65 | 1.932 | 0.000 | 0.361  |
| Kynuramine                          | 187.09 | 283.93 | 2.144 | 0.000 | 0.127  |
| Tyr-Lys                             | 309.16 | 439.95 | 1.940 | 0.000 | 0.398  |
| beta-Octylglucoside                 | 337.16 | 354.30 | 1.954 | 0.000 | 0.315  |
| D-gluconate                         | 238.09 | 368.00 | 1.906 | 0.000 | 0.296  |
| Arg-Thr                             | 339.17 | 451.27 | 1.931 | 0.000 | 0.429  |
| 1,7-Dimethyluric acid               | 260.07 | 370.20 | 1.864 | 0.000 | 0.369  |
| Hippuric acid                       | 180.06 | 174.76 | 1.983 | 0.000 | 1.471  |
| Acetylglycine                       | 118.05 | 368.04 | 1.826 | 0.000 | 0.348  |
| Flumequine                          | 261.08 | 370.43 | 1.891 | 0.000 | 0.482  |
| Caproic acid                        | 158.12 | 47.43  | 1.961 | 0.000 | 2.066  |
| Met-Tyr                             | 312.11 | 306.24 | 1.874 | 0.000 | 0.310  |
| 2-Methylguanosine                   | 298.11 | 218.30 | 1.875 | 0.000 | 0.824  |
| Argininosuccinic acid               | 313.11 | 306.24 | 1.790 | 0.000 | 0.348  |
| Thr-Val                             | 218.12 | 390.98 | 1.910 | 0.000 | 0.437  |
| DL-Vanillylmandelic acid            | 216.09 | 352.43 | 1.972 | 0.001 | 0.400  |
| Gly-Glu                             | 246.11 | 365.74 | 1.578 | 0.001 | 0.491  |
| Glycine                             | 76.04  | 368.02 | 1.795 | 0.001 | 0.463  |
| D-Ribulose 1,5-bisphosphate         | 328.02 | 352.74 | 1.921 | 0.001 | 0.472  |
| Diethanolamine                      | 88.08  | 211.63 | 2.151 | 0.001 | 21.539 |
| Dihydro-4,4-dimethyl-2,3-furandione | 146.08 | 321.22 | 1.816 | 0.001 | 0.815  |
| N4-Acetylcytidine                   | 286.10 | 158.14 | 1.811 | 0.001 | 2.453  |
| 4-Oxoretinol                        | 301.21 | 35.35  | 1.878 | 0.002 | 1.806  |
| Pyridoxine                          | 211.11 | 85.62  | 1.702 | 0.002 | 0.563  |

|                                                        |        |        |       |       |       |
|--------------------------------------------------------|--------|--------|-------|-------|-------|
| 1-Oleoyl-L-.alpha.-lysophosphatidic acid               | 478.29 | 184.67 | 1.774 | 0.002 | 1.547 |
| 3-Aminobenzoic acid                                    | 120.04 | 176.34 | 1.571 | 0.002 | 0.558 |
| Acetyl-DL-Valine                                       | 160.10 | 313.75 | 1.381 | 0.002 | 0.497 |
| Tyr-Glu                                                | 371.14 | 294.15 | 2.022 | 0.003 | 0.219 |
| Gamma-Glutamylcysteine                                 | 292.10 | 409.54 | 1.766 | 0.003 | 0.581 |
| .beta.-Cyano-L-alanine                                 | 175.07 | 209.01 | 1.744 | 0.003 | 0.668 |
| Acetylcarnitine                                        | 204.12 | 293.42 | 1.805 | 0.003 | 1.823 |
| Cortexolone                                            | 385.17 | 364.67 | 1.837 | 0.003 | 0.377 |
| Zolmitriptan                                           | 326.13 | 434.96 | 1.768 | 0.003 | 0.507 |
| Glycerophosphocholine                                  | 258.11 | 372.06 | 1.821 | 0.003 | 0.528 |
| Kynurenic acid                                         | 190.05 | 173.80 | 1.670 | 0.003 | 0.623 |
| 5-Methylcytidine                                       | 258.11 | 194.03 | 1.597 | 0.003 | 0.766 |
| Acadesine (Drug)                                       | 259.10 | 190.63 | 1.680 | 0.004 | 0.635 |
| Valproic acid                                          | 186.15 | 37.65  | 1.879 | 0.004 | 2.070 |
| 1-Palmitoyl-2-hydroxy-sn-glycero-3-phosphoethanolamine | 454.29 | 185.84 | 1.709 | 0.005 | 1.522 |
| Gly-Arg                                                | 295.15 | 433.33 | 1.693 | 0.005 | 0.447 |
| L-Pipecolic acid                                       | 171.11 | 252.57 | 1.960 | 0.006 | 0.179 |
| Pyruvaldehyde                                          | 145.05 | 293.42 | 1.831 | 0.006 | 1.597 |
| 2-Ethoxyethanol                                        | 151.10 | 63.93  | 1.573 | 0.006 | 0.604 |
| Met-Met                                                | 344.10 | 323.63 | 1.705 | 0.007 | 0.512 |
| His-Ser                                                | 225.10 | 303.66 | 1.907 | 0.008 | 2.597 |
| (+)-5,6-DHET                                           | 356.28 | 83.48  | 1.930 | 0.008 | 0.150 |
| Pelletierine                                           | 205.13 | 293.42 | 1.803 | 0.009 | 1.866 |
| Omeprazole                                             | 310.09 | 364.90 | 1.659 | 0.010 | 0.482 |
| Pargyline                                              | 336.25 | 44.39  | 1.582 | 0.010 | 1.338 |
| Oxindole                                               | 194.08 | 204.58 | 1.534 | 0.012 | 0.765 |



|                                |        |        |       |       |       |
|--------------------------------|--------|--------|-------|-------|-------|
| Ile-Asn                        | 284.10 | 371.61 | 1.648 | 0.014 | 0.615 |
| Crotonic acid                  | 128.07 | 251.66 | 1.492 | 0.014 | 0.732 |
| alpha-N-Acetyl-L-glutamine     | 211.07 | 288.73 | 1.514 | 0.014 | 0.715 |
| D-Glucono-1,5-lactone          | 220.08 | 394.62 | 1.396 | 0.015 | 0.564 |
| 2-Methyl-3-hydroxybutyric acid | 259.12 | 28.24  | 1.416 | 0.015 | 1.599 |
| Troglitazone                   | 459.21 | 338.33 | 1.886 | 0.015 | 0.138 |
| N-Acetylmannosamine            | 260.05 | 29.54  | 1.391 | 0.015 | 0.492 |
| Levonordefrin                  | 148.07 | 171.38 | 1.418 | 0.016 | 0.766 |
| 20-Hydroxyarachidonic acid     | 362.27 | 43.41  | 1.796 | 0.018 | 0.539 |
| Altretamine                    | 228.20 | 37.41  | 1.417 | 0.018 | 1.777 |
| Ile-Tyr                        | 294.15 | 340.46 | 1.518 | 0.019 | 0.501 |
| N-.alpha.-Acetyl-L-arginine    | 217.13 | 355.67 | 1.567 | 0.020 | 0.597 |
| His-Thr                        | 257.12 | 346.14 | 1.519 | 0.021 | 0.615 |
| L-Carnitine                    | 162.11 | 292.16 | 1.418 | 0.024 | 0.810 |
| Quinate                        | 234.10 | 394.49 | 1.542 | 0.025 | 0.693 |
| Itaconic acid                  | 172.06 | 288.73 | 1.391 | 0.025 | 0.698 |
| PC(16:0/16:0)                  | 756.55 | 137.01 | 1.509 | 0.025 | 1.248 |
| Urea                           | 61.04  | 105.91 | 1.415 | 0.026 | 0.907 |
| Taurochenodeoxycholate         | 482.29 | 142.18 | 1.430 | 0.026 | 0.593 |
| 3-Ureidopropionate             | 133.06 | 295.32 | 1.365 | 0.027 | 0.812 |
| Desmosterol                    | 385.34 | 34.02  | 1.237 | 0.030 | 1.234 |
| cis-4-Hydroxy-D-proline        | 173.09 | 340.80 | 1.484 | 0.030 | 0.601 |
| Behenic acid                   | 358.37 | 51.57  | 1.208 | 0.032 | 0.562 |
| N-Oleylethanolamine            | 326.30 | 35.30  | 1.494 | 0.035 | 1.358 |
| Lys-Cys                        | 291.15 | 464.66 | 1.390 | 0.036 | 0.661 |
| Jasmine lactone                | 354.26 | 44.13  | 1.387 | 0.036 | 1.225 |

|                                                     |        |        |       |       |       |
|-----------------------------------------------------|--------|--------|-------|-------|-------|
| Decanoyl-L-carnitine                                | 316.25 | 177.39 | 1.200 | 0.036 | 0.780 |
| Taurodeoxycholic acid                               | 500.30 | 142.50 | 1.388 | 0.038 | 0.574 |
| Betaine aldehyde                                    | 102.09 | 343.59 | 1.247 | 0.040 | 0.869 |
| Erythritol                                          | 186.07 | 147.14 | 1.198 | 0.041 | 0.879 |
| Methoxyacetic acid                                  | 181.07 | 174.53 | 1.504 | 0.042 | 1.550 |
| Metronidazole                                       | 172.07 | 37.71  | 1.480 | 0.042 | 0.328 |
| 2E-Eicosenoic acid                                  | 377.23 | 34.72  | 1.608 | 0.044 | 0.247 |
| Imidazole                                           | 110.07 | 25.89  | 1.320 | 0.045 | 0.753 |
| Scopoline                                           | 156.10 | 351.74 | 1.312 | 0.046 | 0.766 |
| Diethylcarbamazine                                  | 241.20 | 27.69  | 1.219 | 0.048 | 0.845 |
| PC(20:5(5Z,8Z,11Z,14Z,17Z)/20:5(5Z,8Z,11Z,14Z,17Z)) | 809.54 | 46.50  | 1.423 | 0.050 | 67.81 |

---

**Table S7.** Pathway analysis of serum metabolomics in MHB and CON groups of fattening sheep.

| Pathway                                     | Total | Hits | Raw p | Impact | Hits compounds                                                            |
|---------------------------------------------|-------|------|-------|--------|---------------------------------------------------------------------------|
| Glycine, serine and threonine metabolism    | 32    | 3    | 0.038 | 0.292  | Glycine cpd:C00037; Betaine aldehyde cpd:C00576; Pyruvaldehyde cpd:C00546 |
| Cyanoamino acid metabolism                  | 6     | 1    | 0.134 | 0.000  | Glycine cpd:C00037                                                        |
| Methane metabolism                          | 9     | 1    | 0.195 | 0.000  | Glycine cpd:C00037                                                        |
| Nitrogen metabolism                         | 9     | 1    | 0.195 | 0.000  | Glycine cpd:C00037                                                        |
| Vitamin B6 metabolism                       | 9     | 1    | 0.194 | 0.078  | Pyridoxine cpd:C00314                                                     |
| Arginine and proline metabolism             | 44    | 2    | 0.281 | 0.022  | Argininosuccinic acid cpd:C03406; Urea cpd:C00086                         |
| Primary bile acid biosynthesis              | 46    | 2    | 0.299 | 0.060  | Glycine cpd:C00037; Taurochenodesoxycholic acid cpd:C05465                |
| Pantothenate and CoA biosynthesis           | 15    | 1    | 0.304 | 0.041  | Ureidopropionic acid cpd:C02642                                           |
| beta-Alanine metabolism                     | 17    | 1    | 0.337 | 0.222  | Ureidopropionic acid cpd:C02642                                           |
| Pentose phosphate pathway                   | 19    | 1    | 0.368 | 0.000  | Gluconolactone cpd:C00198                                                 |
| Propanoate metabolism                       | 20    | 1    | 0.383 | 0.000  | 2-Hydroxybutyric acid cpd:C05984                                          |
| Pyruvate metabolism                         | 22    | 1    | 0.413 | 0.054  | Pyruvaldehyde cpd:C00546                                                  |
| Alanine, aspartate and glutamate metabolism | 23    | 1    | 0.427 | 0.020  | Argininosuccinic acid cpd:C03406                                          |
| Porphyrin and chlorophyll metabolism        | 25    | 1    | 0.454 | 0.000  | Glycine cpd:C00037                                                        |
| Glutathione metabolism                      | 26    | 1    | 0.467 | 0.006  | Glycine cpd:C00037                                                        |

|                                             |    |   |       |       |                                                      |
|---------------------------------------------|----|---|-------|-------|------------------------------------------------------|
| Glycerophospholipid metabolism              | 29 | 1 | 0.505 | 0.024 | Glycerophosphocholine cpd:C00670                     |
| Steroid biosynthesis                        | 35 | 1 | 0.573 | 0.000 | Desmosterol cpd:C01802                               |
| Pyrimidine metabolism                       | 37 | 1 | 0.594 | 0.021 | Ureidopropionic acid cpd:C02642                      |
| Amino sugar and nucleotide sugar metabolism | 37 | 1 | 0.594 | 0.142 | N-Acetylmannosamine cpd:C00645                       |
| Biosynthesis of unsaturated fatty acids     | 42 | 1 | 0.641 | 0.000 | Behenic acid cpd:C08281                              |
| Tyrosine metabolism                         | 42 | 1 | 0.641 | 0.001 | 3,4-Dihydroxybenzeneacetic acid cpd:C01161           |
| Drug metabolism - cytochrome P450           | 56 | 1 | 0.746 | 0.000 | Valproic acid cpd:C07185                             |
| Aminoacyl-tRNA biosynthesis                 | 64 | 1 | 0.793 | 0.000 | Glycine cpd:C00037                                   |
| Purine metabolism                           | 68 | 1 | 0.812 | 0     | Urea cpd:C00086                                      |
| Glycerolipid metabolism                     | 18 | 2 | 0.040 | 0.307 | Glycerol 3-phosphate cpd:C00093; Glycerol cpd:C00116 |
| Terpenoid backbone biosynthesis             | 15 | 1 | 0.239 | 0.172 | Mevalonic acid-5P cpd:C01107                         |
| Galactose metabolism                        | 26 | 1 | 0.379 | 0.000 | Glycerol cpd:C00116                                  |
| Arachidonic acid metabolism                 | 36 | 1 | 0.484 | 0.326 | Arachidonic acid cpd:C00219                          |
| Fatty acid biosynthesis                     | 38 | 1 | 0.503 | 0.000 | Myristic acid cpd:C06424                             |
| Tryptophan metabolism                       | 41 | 1 | 0.530 | 0.010 | Formylanthranilic acid cpd:C05653                    |

---

**Table S8.** Significant differences in metabolites between MHB and CON groups in urine of fattening sheep.

| Name                               | MZ     | R.T(min) | VIP   | <i>p</i> -Value | FC     |
|------------------------------------|--------|----------|-------|-----------------|--------|
| <b>Negative</b>                    |        |          |       |                 |        |
| Lecanoric acid                     | 377.10 | 286.52   | 2.345 | 0.000           | 3.326  |
| 1-Naphthol                         | 160.08 | 172.93   | 2.340 | 0.000           | 2.066  |
| Ramipril                           | 415.23 | 215.71   | 2.535 | 0.001           | 27.859 |
| Aminohippuric acid                 | 193.06 | 180.96   | 2.146 | 0.002           | 0.364  |
| Cysteinylglycine                   | 194.06 | 180.90   | 2.135 | 0.003           | 0.373  |
| Ribothymidine                      | 274.11 | 45.75    | 2.423 | 0.003           | 2.808  |
| 17.β.-Estradiol 3-β.-D-glucuronide | 507.22 | 234.90   | 2.369 | 0.003           | 5.613  |
| DL-O-tyrosine                      | 361.15 | 288.72   | 2.412 | 0.004           | 12.262 |
| Clozapine                          | 325.13 | 46.37    | 1.805 | 0.006           | 0.556  |
| 3-Phosphoserine                    | 185.01 | 71.82    | 1.936 | 0.010           | 0.474  |
| N-Acetyl-L-phenylalanine           | 206.08 | 172.31   | 1.876 | 0.013           | 1.456  |
| Succinylacetone                    | 217.07 | 133.12   | 1.944 | 0.013           | 1.968  |
| Kainic Acid                        | 234.08 | 69.44    | 1.968 | 0.014           | 3.010  |
| Pectin (Galacturonic acid)         | 193.03 | 216.96   | 1.973 | 0.019           | 3.663  |
| 4-Hydroxybenzaldehyde              | 243.07 | 46.27    | 1.660 | 0.021           | 0.604  |
| Dicumarol                          | 335.05 | 102.25   | 1.649 | 0.023           | 0.646  |
| Estrone-3-glucuronide              | 445.18 | 215.71   | 1.891 | 0.024           | 11.010 |
| 5'-Deoxyadenosine                  | 250.09 | 208.73   | 1.899 | 0.025           | 1.598  |
| Phosphocreatine                    | 211.04 | 277.95   | 1.665 | 0.032           | 0.469  |
| γ-Glutamyl-L-methionine            | 259.07 | 269.99   | 1.828 | 0.036           | 0.535  |
| Traumatic Acid                     | 265.09 | 28.58    | 2.253 | 0.040           | 5.034  |
| 3-Isopropylmalate                  | 157.05 | 131.27   | 1.478 | 0.042           | 0.615  |
| O-Phospho-L-threonine              | 199.03 | 51.15    | 1.979 | 0.042           | 0.508  |

|                                    |        |        |       |       |       |
|------------------------------------|--------|--------|-------|-------|-------|
| Acetohexamide                      | 361.06 | 209.47 | 1.264 | 0.047 | 7.028 |
| <b>Postive</b>                     |        |        |       |       |       |
| 4-Hydroxy-3-methoxycinnamaldehyde  | 217.03 | 202.03 | 2.851 | 0.000 | 6.249 |
| Imidazole                          | 132.05 | 172.71 | 2.315 | 0.000 | 2.510 |
| gamma-Aminobutyric acid            | 121.10 | 34.18  | 2.451 | 0.001 | 1.793 |
| Jasmine lactone                    | 151.11 | 49.32  | 2.699 | 0.002 | 3.235 |
| Allocystathionine                  | 187.05 | 271.16 | 2.170 | 0.002 | 2.925 |
| alpha-Farnesene                    | 205.19 | 214.87 | 2.199 | 0.002 | 2.188 |
| Oxaloacetate                       | 193.03 | 215.36 | 2.697 | 0.003 | 8.740 |
| Benzylazanium                      | 149.11 | 28.68  | 2.732 | 0.003 | 4.507 |
| Lavandulol                         | 137.13 | 222.76 | 2.762 | 0.004 | 8.251 |
| Hippuric acid                      | 180.07 | 179.65 | 1.784 | 0.006 | 2.338 |
| 5'-Deoxyadenosine                  | 269.13 | 234.70 | 2.415 | 0.006 | 0.680 |
| 4-Hydroxybutanoic acid lactone     | 128.07 | 78.51  | 2.231 | 0.009 | 1.982 |
| Ser-Lys                            | 310.05 | 338.55 | 2.259 | 0.014 | 0.371 |
| 2'-O-methylcytidine                | 258.11 | 168.18 | 1.841 | 0.015 | 1.484 |
| (S)-(-)-Citronellic acid           | 171.14 | 217.37 | 2.664 | 0.016 | 5.566 |
| 3-Mercapto-2-butanone              | 247.03 | 90.21  | 2.188 | 0.017 | 0.508 |
| Pro-Ala                            | 204.13 | 322.10 | 2.018 | 0.020 | 1.482 |
| Midazolam                          | 389.09 | 43.45  | 1.988 | 0.020 | 0.537 |
| Tyr-Gln                            | 292.13 | 33.61  | 1.934 | 0.021 | 0.602 |
| Sumatriptan                        | 340.11 | 399.92 | 2.038 | 0.022 | 1.640 |
| Anthranilic acid (Vitamin L1)      | 138.05 | 274.40 | 2.560 | 0.023 | 0.374 |
| Gly-Glu                            | 265.11 | 228.71 | 2.108 | 0.030 | 0.713 |
| 2'-Deoxy-D-ribose                  | 134.06 | 179.86 | 1.595 | 0.031 | 1.430 |
| 1-Aminocyclopropanecarboxylic acid | 143.08 | 321.82 | 2.402 | 0.032 | 0.585 |

|                |        |        |       |       |       |
|----------------|--------|--------|-------|-------|-------|
| Mirtazapine    | 266.16 | 27.97  | 2.257 | 0.035 | 2.231 |
| Mevalonic acid | 319.14 | 110.84 | 1.966 | 0.036 | 5.642 |
| L-Valine       | 235.17 | 49.40  | 1.548 | 0.038 | 0.570 |
| Xylitol        | 153.07 | 283.42 | 1.502 | 0.039 | 1.482 |
| Larixinic Acid | 127.04 | 37.49  | 1.787 | 0.040 | 2.168 |
| Securinine     | 240.10 | 240.73 | 1.309 | 0.048 | 1.541 |

---

**Table S9.** Pathway analysis of urine metabolomics in MHB and CON groups of fattening sheep.

| Pathway                                     | Total | Hits | Raw p | Impact | Hits compounds                 |
|---------------------------------------------|-------|------|-------|--------|--------------------------------|
| Valine, leucine and isoleucine biosynthesis | 11    | 1    | 0.069 | 0.333  | L-Valine cpd:C00183            |
| Pentose and glucuronate interconversions    | 15    | 1    | 0.093 | 0.000  | D-Xylitol cpd:C00379           |
| Pantothenate and CoA biosynthesis           | 15    | 1    | 0.093 | 0.000  | L-Valine cpd:C00183            |
| Terpenoid backbone biosynthesis             | 15    | 1    | 0.093 | 0.145  | Mevalonic acid cpd:C00418      |
| Glyoxylate and dicarboxylate metabolism     | 16    | 1    | 0.099 | 0.148  | Oxalacetic acid cpd:C00036     |
| Pentose phosphate pathway                   | 19    | 1    | 0.117 | 0.000  | Deoxyribose cpd:C01801         |
| Citrate cycle (TCA cycle)                   | 20    | 1    | 0.123 | 0.114  | Oxalacetic acid cpd:C00036     |
| Pyruvate metabolism                         | 22    | 1    | 0.134 | 0.015  | Oxalacetic acid cpd:C00036     |
| Alanine, aspartate and glutamate metabolism | 23    | 1    | 0.140 | 0.087  | Oxalacetic acid cpd:C00036     |
| Glycolysis or Gluconeogenesis               | 26    | 1    | 0.157 | 0.000  | Oxalacetic acid cpd:C00036     |
| Valine, leucine and isoleucine degradation  | 38    | 1    | 0.221 | 0.000  | L-Valine cpd:C00183            |
| Aminoacyl-tRNA biosynthesis                 | 64    | 1    | 0.346 | 0.000  | L-Valine cpd:C00183            |
| Glutathione metabolism                      | 26    | 1    | 0.157 | 0.008  | Cysteinylglycine cpd:C01419    |
| Arginine and proline metabolism             | 44    | 1    | 0.251 | 0      | Phosphocreatine cpd:C02305     |
| Steroid hormone biosynthesis                | 67    | 1    | 0.360 | 0      | Estrone glucuronide cpd:C11133 |



**Table S10.** Analysis of significant differential expression of circRNA between MHB group and CON group.

| circRNA id <sup>1</sup> | MeanTPM <sup>2</sup><br>(MHB) | MeanTPM<br>(CON) | log2FoldChange <sup>3</sup> | p-Value <sup>4</sup> |
|-------------------------|-------------------------------|------------------|-----------------------------|----------------------|
| <b>UP</b>               |                               |                  |                             |                      |
| circRNA05275            | 53.586                        | 0.000            | 19.032                      | 0.032                |
| circRNA01712            | 930.87                        | 175.609          | 2.406                       | 0.042                |
| circRNA00452            | 258.294                       | 100.547          | 1.361                       | 0.045                |
| circRNA01373            | 473.793                       | 0.000            | 22.176                      | 0.0148               |
| circRNA00282            | 515.822                       | 0.000            | 22.298                      | 0.011                |
| circRNA01037            | 1960.256                      | 0.000            | 24.225                      | 0.045                |
| circRNA04879            | 305.979                       | 0.000            | 21.545                      | 0.025                |
| circRNA04936            | 61.442                        | 0.000            | 19.229                      | 0.017                |
| circRNA01358            | 823.354                       | 0.000            | 22.973                      | 0.036                |
| <b>Down</b>             |                               |                  |                             |                      |
| circRNA01240            | 273.720                       | 861.046          | -1.653                      | 0.044                |
| circRNA04405            | 0.000                         | 69.112           | -19.399                     | 0.0165               |
| circRNA04145            | 0.000                         | 649.119          | -22.630                     | 0.0379               |
| circRNA01788            | 289.793                       | 2644.997         | -3.190                      | 0.0229               |
| circRNA03991            | 0.000                         | 137.537          | -20.391                     | 0.041                |

<sup>1</sup> circRNA ID: Transcript number.

<sup>2</sup> MeanTPM: Expression level of grouping.

<sup>3</sup> log2FoldChange: log2 value of difference multiple.

<sup>4</sup> p-Value: Statistical significance test indicators.

**Table S11.** 30 significantly enriched differential circRNAs in the MHB diet group.

| GO.ID <sup>1</sup> | Term <sup>2</sup>                                                  | Ontology <sup>3</sup> | Significant <sup>4</sup> | Annotated <sup>5</sup> | p-Value |
|--------------------|--------------------------------------------------------------------|-----------------------|--------------------------|------------------------|---------|
| GO:0070498         | interleukin-1-mediated signaling pathway                           | biological process    | 2/11                     | 17/14620               | 0.000   |
| GO:0071347         | cellular response to interleukin-1                                 | biological process    | 2/11                     | 46/14620               | 0.001   |
| GO:0043990         | histone H2A-S1 phosphorylation                                     | biological process    | 1/11                     | 1/14620                | 0.001   |
| GO:0070555         | response to interleukin-1                                          | biological process    | 2/11                     | 56/14620               | 0.001   |
| GO:0019276         | UDP-N-acetylgalactosamine metabolic process                        | biological process    | 1/11                     | 3/14620                | 0.002   |
| GO:0043987         | histone H3-S10 phosphorylation                                     | biological process    | 1/11                     | 3/14620                | 0.002   |
| GO:0043988         | histone H3-S28 phosphorylation                                     | biological process    | 1/11                     | 3/14620                | 0.002   |
| GO:1990164         | histone H2A phosphorylation                                        | biological process    | 1/11                     | 3/14620                | 0.002   |
| GO:0006047         | UDP-N-acetylglucosamine metabolic process                          | biological process    | 1/11                     | 4/14620                | 0.003   |
| GO:1902083         | negative regulation of peptidyl-cysteine S-nitrosylation           | biological process    | 1/11                     | 4/14620                | 0.003   |
| GO:0033129         | positive regulation of histone phosphorylation                     | biological process    | 1/11                     | 5/14620                | 0.004   |
| GO:0071447         | cellular response to hydroperoxide                                 | biological process    | 1/11                     | 5/14620                | 0.004   |
| GO:2000169         | regulation of peptidyl-cysteine S-nitrosylation                    | biological process    | 1/11                     | 5/14620                | 0.004   |
| GO:2000659         | regulation of interleukin-1-mediated signaling pathway             | biological process    | 1/11                     | 5/14620                | 0.004   |
| GO:0001842         | neural fold formation                                              | biological process    | 1/11                     | 6/14620                | 0.005   |
| GO:1905064         | negative regulation of vascular smooth muscle cell differentiation | biological process    | 1/11                     | 6/14620                | 0.005   |
| GO:0035404         | histone-serine phosphorylation                                     | biological process    | 1/11                     | 7/14620                | 0.005   |
| GO:0030259         | lipid glycosylation                                                | biological process    | 1/11                     | 8/14620                | 0.006   |
| GO:0034599         | cellular response to oxidative stress                              | biological process    | 2/11                     | 168/14620              | 0.007   |
| GO:0017014         | protein nitrosylation                                              | biological process    | 1/11                     | 9/14620                | 0.007   |

|            |                                                                            |    |                       |      |          |       |
|------------|----------------------------------------------------------------------------|----|-----------------------|------|----------|-------|
| GO:0018119 | peptidyl-cysteine<br>nitrosylation                                         | S- | biological<br>process | 1/11 | 9/14620  | 0.007 |
| GO:1905063 | regulation of vascular smooth<br>muscle cell differentiation               |    | biological<br>process | 1/11 | 9/14620  | 0.007 |
| GO:0033127 | regulation of histone<br>phosphorylation                                   |    | biological<br>process | 1/11 | 10/14620 | 0.008 |
| GO:0033194 | response to hydroperoxide                                                  |    | biological<br>process | 1/11 | 11/14620 | 0.008 |
| GO:0051151 | negative regulation of smooth<br>muscle cell differentiation               |    | biological<br>process | 1/11 | 12/14620 | 0.009 |
| GO:1901741 | positive regulation of<br>myoblast fusion                                  |    | biological<br>process | 1/11 | 12/14620 | 0.009 |
| GO:1901739 | regulation of myoblast fusion                                              |    | biological<br>process | 1/11 | 15/14620 | 0.011 |
| GO:1903204 | negative regulation of<br>oxidative stress-induced<br>neuron death         |    | biological<br>process | 1/11 | 16/14620 | 0.012 |
| GO:0035886 | vascular smooth muscle cell<br>differentiation                             |    | biological<br>process | 1/11 | 18/14620 | 0.013 |
| GO:0060143 | positive regulation of<br>syncytium formation by<br>plasma membrane fusion |    | biological<br>process | 1/11 | 19/14620 | 0.014 |

---

<sup>1</sup> GO.ID: Number and name of GO.

<sup>2</sup> Term: Description information of GO function.

<sup>3</sup> Ontology: Category of GO (cellular component; biological process; molecular function) .

<sup>4</sup> Significant: Number of differentially expressed circRNA host genes annotated to the GO/Number of differentially expressed circRNA host genes annotated to the GO database.

<sup>5</sup> Annotated: Number of genes annotated to the GO/Number of genes annotated to the GO database.

**Table S12.** Significant differential expression analysis of transcripts (lncRNA, mRNA) between MHB group and CON group.

| Transcript id <sup>1</sup> | MeanTPM<br>(MHB) | MeanTPM<br>(CON) | log2FoldChange | p-Value |
|----------------------------|------------------|------------------|----------------|---------|
| <b>UP</b>                  |                  |                  |                |         |
| MSTRG.86362.1              | 30.193           | 0.000            | 18.204         | 0.000   |
| ENSOART00000000780         | 25.157           | 3.633            | 2.792          | 0.000   |
| ENSOART000000017401        | 10.127           | 3.757            | 1.431          | 0.000   |
| ENSOART000000008854        | 14.040           | 1.057            | 3.732          | 0.000   |
| ENSOART000000020109        | 20.330           | 3.070            | 2.727          | 0.000   |
| ENSOART000000014168        | 8.613            | 2.243            | 1.941          | 0.000   |
| ENSOART000000014772        | 7.207            | 0.987            | 2.869          | 0.000   |
| ENSOART000000016187        | 7.333            | 1.877            | 1.966          | 0.000   |
| ENSOART000000005238        | 5.547            | 0.320            | 4.115          | 0.000   |
| ENSOART000000016232        | 17.523           | 0.057            | 8.273          | 0.000   |
| <b>Down</b>                |                  |                  |                |         |
| MSTRG.26668.6              | 0.000            | 32.857           | -18.326        | 0.000   |
| MSTRG.87688.2              | 0.080            | 14.313           | -7.483         | 0.000   |
| MSTRG.90841.1              | 0.570            | 6.277            | -3.461         | 0.000   |
| ENSOART000000008940        | 2.140            | 9.407            | -2.136         | 0.000   |
| ENSOART000000017457        | 0.000            | 10.403           | -16.667        | 0.000   |
| ENSOART000000000735        | 0.000            | 7.543            | -16.203        | 0.000   |
| ENSOART000000006877        | 0.923            | 14.480           | -3.971         | 0.000   |
| ENSOART000000006875        | 0.001            | 10.270           | -16.648        | 0.000   |
| ENSOART000000018756        | 0.657            | 52.057           | -6.309         | 0.000   |
| ENSOART000000011885        | 0.000            | 5.317            | -15.698        | 0.000   |
| ENSOART000000017226        | 1.967            | 6.463            | -1.717         | 0.000   |
| ENSOART000000003468        | 0.000            | 64.963           | -19.309        | 0.000   |
| ENSOART000000022712        | 202.550          | 422.400          | -1.060         | 0.000   |
| ENSOART000000005620        | 56.587           | 277.410          | -2.293         | 0.000   |
| ENSOART000000007695        | 12.797           | 33.660           | -1.395         | 0.000   |
| ENSOART000000014234        | 0.030            | 37.867           | -10.302        | 0.000   |
| ENSOART000000015276        | 42.830           | 98.020           | -1.194         | 0.000   |

<sup>1</sup>Transcript ID: Transcript number.

**Table S13.** Gene functions corresponding to 30 significantly enriched differential transcripts in the MHB group.

| <b>GO.ID</b> | <b>Term</b>                                                                     | <b>Qntology</b>    | <b>Significant</b> | <b>Annotated</b> | <b>p-Value</b> |
|--------------|---------------------------------------------------------------------------------|--------------------|--------------------|------------------|----------------|
| GO:0090049   | regulation of cell migration involved in sprouting angiogenesis                 | biological process | 2/19               | 30/14620         | 0.001          |
| GO:0002042   | cell migration involved in sprouting angiogenesis                               | biological process | 2/19               | 41/14620         | 0.001          |
| GO:0034395   | regulation of transcription from RNA polymerase II promoter in response to iron | biological process | 1/19               | 1/14620          | 0.001          |
| GO:0036335   | intestinal stem cell homeostasis                                                | biological process | 1/19               | 1/14620          | 0.001          |
| GO:0030336   | negative regulation of cell migration                                           | biological process | 3/19               | 179/14620        | 0.002          |
| GO:1903670   | regulation of sprouting angiogenesis                                            | biological process | 2/19               | 46/14620         | 0.002          |
| GO:2000146   | negative regulation of cell motility                                            | biological process | 3/19               | 189/14620        | 0.002          |
| GO:0010631   | epithelial cell migration                                                       | biological process | 3/19               | 201/14620        | 0.002          |
| GO:0051271   | negative regulation of cellular component movement                              | biological process | 3/19               | 202/14620        | 0.002          |
| GO:0090132   | epithelium migration                                                            | biological process | 3/19               | 203/14620        | 0.002          |
| GO:0009408   | response to heat                                                                | biological process | 2/19               | 54/14620         | 0.002          |
| GO:0090130   | tissue migration                                                                | biological process | 3/19               | 208/14620        | 0.002          |
| GO:0040013   | negative regulation of locomotion                                               | biological process | 3/19               | 211/14620        | 0.002          |
| GO:0006788   | heme oxidation                                                                  | biological process | 1/19               | 2/14620          | 0.003          |
| GO:0060995   | cell-cell signaling involved in kidney development                              | biological process | 1/19               | 2/14620          | 0.003          |
| GO:0061289   | Wnt signaling pathway involved in kidney development                            | biological process | 1/19               | 2/14620          | 0.003          |
| GO:0061290   | canonical Wnt signaling pathway involved in                                     | biological process | 1/19               | 2/14620          | 0.003          |

|            |                                                                      |                    |      |           |       |  |
|------------|----------------------------------------------------------------------|--------------------|------|-----------|-------|--|
|            | metanephric kidney development                                       |                    |      |           |       |  |
| GO:0072204 | cell-cell signaling involved in metanephros development              | biological process | 1/19 | 2/14620   | 0.003 |  |
| GO:0106004 | tRNA (guanine-N7)-methylation                                        | biological process | 1/19 | 2/14620   | 0.003 |  |
| GO:0043535 | regulation of blood vessel endothelial cell migration                | biological process | 2/19 | 68/14620  | 0.003 |  |
| GO:0019276 | UDP-N-acetylgalactosamine metabolic process                          | biological process | 1/19 | 3/14620   | 0.004 |  |
| GO:0072718 | response to cisplatin                                                | biological process | 1/19 | 3/14620   | 0.004 |  |
| GO:0072719 | cellular response to cisplatin                                       | biological process | 1/19 | 3/14620   | 0.004 |  |
| GO:2001013 | epithelial cell proliferation involved in renal tubule morphogenesis | biological process | 1/19 | 3/14620   | 0.004 |  |
| GO:0002040 | sprouting angiogenesis                                               | biological process | 2/19 | 74/14620  | 0.004 |  |
| GO:0006979 | response to oxidative stress                                         | biological process | 3/19 | 256/14620 | 0.004 |  |
| GO:0001667 | ameboidal-type cell migration                                        | biological process | 3/19 | 271/14620 | 0.005 |  |
| GO:0042303 | molting cycle                                                        | biological process | 2/19 | 82/14620  | 0.005 |  |
| GO:0042633 | hair cycle                                                           | biological process | 2/19 | 82/14620  | 0.005 |  |
| GO:0006047 | UDP-N-acetylglucosamine metabolic process                            | biological process | 1/19 | 4/14620   | 0.005 |  |

**Table S14.** Analysis of significant differences in miRNA expression between MHB group and CON group.

| <b>Id<sup>1</sup></b> | <b>Log2FoldChange<sup>2</sup></b> | <b>Log2CPM<sup>3</sup></b> | <b>p-Value</b> |
|-----------------------|-----------------------------------|----------------------------|----------------|
| <b>Up</b>             |                                   |                            |                |
| aae-miR-124           | 4.574                             | -1.234                     | 0.001          |
| aca-miR-124a          | 4.574                             | -1.234                     | 0.001          |
| aca-miR-124b          | 4.934                             | -1.293                     | 0.002          |
| aca-miR-191-3p        | 1.536                             | -2.902                     | 0.027          |
| aca-miR-34a-5p        | 3.375                             | -1.478                     | 0.019          |
| aca-miR-34c-5p        | 3.375                             | -1.478                     | 0.019          |
| aga-miR-124           | 4.574                             | -1.234                     | 0.001          |
| age-miR-124a          | 4.844                             | -0.794                     | 0.001          |
| aja-miR-21            | 1.429                             | 1.818                      | 0.010          |
| ame-miR-124           | 4.574                             | -1.234                     | 0.001          |
| api-miR-124           | 4.574                             | -1.234                     | 0.001          |
| asu-miR-124-3p        | 4.574                             | -1.234                     | 0.001          |
| bbe-miR-124-3p        | 4.574                             | -1.234                     | 0.001          |
| bfl-miR-124-3p        | 4.574                             | -1.234                     | 0.001          |
| bma-miR-124           | 4.574                             | -1.234                     | 0.001          |
| bmo-miR-124           | 4.574                             | -1.234                     | 0.001          |
| bmo-miR-2779          | 1.933                             | 6.141                      | 0.017          |
| bta-miR-124a          | 4.574                             | -1.234                     | 0.001          |
| bta-miR-124b          | 4.574                             | -1.234                     | 0.001          |
| bta-miR-1814c         | 3.608                             | -4.041                     | 0.010          |
| bta-miR-21-3p         | 1.323                             | 2.304                      | 0.006          |
| bta-miR-2310          | 3.608                             | -4.041                     | 0.010          |
| bta-miR-2318          | 4.338                             | -3.767                     | 0.023          |
| bta-miR-2404          | 2.367                             | -2.346                     | 0.017          |
| bta-miR-2478          | 1.087                             | 7.090                      | 0.011          |
| bta-miR-34c           | 3.375                             | -1.478                     | 0.019          |
| bta-miR-412           | 1.724                             | -3.596                     | 0.050          |
| cbn-miR-124           | 4.574                             | -1.234                     | 0.001          |
| cbr-miR-124a          | 4.574                             | -1.234                     | 0.001          |
| cel-miR-124-3p        | 4.574                             | -1.234                     | 0.001          |
| cfa-miR-124           | 4.574                             | -1.234                     | 0.001          |
| cfa-miR-146a          | 2.455                             | 2.187                      | 0.008          |
| cfa-miR-34c           | 3.493                             | 1.219                      | 0.023          |
| cgr-miR-124           | 4.574                             | -1.234                     | 0.001          |
| cgr-miR-146a          | 2.455                             | 2.187                      | 0.008          |
| cgr-miR-21-3p         | 1.429                             | 1.818                      | 0.010          |
| cgr-miR-322-5p        | 2.174                             | -2.821                     | 0.045          |
| cgr-miR-34c-5p        | 3.493                             | 1.219                      | 0.023          |
| cgr-miR-412-3p        | 1.724                             | -3.596                     | 0.050          |
| cgr-miR-744-3p        | 1.659                             | -2.912                     | 0.048          |

|                 |       |        |       |
|-----------------|-------|--------|-------|
| chi-miR-124a    | 4.574 | -1.234 | 0.001 |
| chi-miR-1814    | 3.608 | -4.041 | 0.010 |
| chi-miR-21-3p   | 1.429 | 1.818  | 0.010 |
| chi-miR-2318    | 4.338 | -3.767 | 0.023 |
| chi-miR-2404    | 2.367 | -2.346 | 0.017 |
| chi-miR-34c-5p  | 3.493 | 1.219  | 0.023 |
| chi-miR-412-3p  | 1.724 | -3.596 | 0.050 |
| cin-miR-124-3p  | 4.574 | -1.234 | 0.001 |
| cqu-miR-124     | 4.574 | -1.234 | 0.001 |
| crm-miR-124a    | 4.574 | -1.234 | 0.001 |
| csa-miR-124     | 4.574 | -1.234 | 0.001 |
| cte-miR-124     | 4.574 | -1.234 | 0.001 |
| dan-miR-124     | 4.574 | -1.234 | 0.001 |
| der-miR-124     | 4.574 | -1.234 | 0.001 |
| dgr-miR-124     | 4.574 | -1.234 | 0.001 |
| dme-miR-124-3p  | 4.574 | -1.234 | 0.001 |
| dmo-miR-124     | 4.574 | -1.234 | 0.001 |
| dpe-miR-124     | 4.574 | -1.234 | 0.001 |
| dps-miR-124     | 4.574 | -1.234 | 0.001 |
| dpu-miR-124     | 4.574 | -1.234 | 0.001 |
| dre-miR-124-3p  | 4.574 | -1.234 | 0.001 |
| dse-miR-124     | 4.574 | -1.234 | 0.001 |
| dsi-miR-124     | 4.574 | -1.234 | 0.001 |
| dvi-miR-124-3p  | 4.574 | -1.234 | 0.001 |
| dwi-miR-124     | 4.574 | -1.234 | 0.001 |
| dya-miR-124     | 4.574 | -1.234 | 0.001 |
| eca-miR-124     | 4.574 | -1.234 | 0.001 |
| eca-miR-146a    | 2.455 | 2.187  | 0.008 |
| eca-miR-34c     | 3.493 | 1.219  | 0.023 |
| efu-miR-124     | 4.844 | -0.794 | 0.001 |
| efu-miR-21      | 1.429 | 1.818  | 0.010 |
| efu-miR-9277    | 1.473 | 1.818  | 0.029 |
| egr-miR-124a    | 4.574 | -1.234 | 0.001 |
| emu-miR-124a    | 4.574 | -1.234 | 0.001 |
| fru-miR-124     | 4.574 | -1.234 | 0.001 |
| gga-miR-124a-3p | 4.844 | -0.794 | 0.001 |
| gga-miR-146a-5p | 2.455 | 2.187  | 0.008 |
| gga-miR-34b-5p  | 3.375 | -1.478 | 0.019 |
| gga-miR-34c-5p  | 3.493 | 1.219  | 0.023 |
| ggo-miR-124a    | 4.844 | -0.794 | 0.001 |
| ggo-miR-146a    | 2.455 | 2.187  | 0.008 |
| ggo-miR-34c     | 3.375 | -1.478 | 0.019 |
| ggo-miR-503     | 4.767 | -4.230 | 0.049 |
| hco-miR-124     | 4.574 | -1.234 | 0.001 |



|                          |       |        |       |
|--------------------------|-------|--------|-------|
| hme-miR-124              | 4.574 | -1.234 | 0.001 |
| hsa-miR-124-3p           | 4.574 | -1.234 | 0.001 |
| hsa-miR-146a-5p          | 2.455 | 2.187  | 0.008 |
| hsa-miR-21-3p            | 4.094 | -2.872 | 0.002 |
| hsa-miR-34c-5p           | 3.493 | 1.219  | 0.023 |
| hsa-miR-4454             | 1.002 | 9.396  | 0.043 |
| hsa-miR-4508             | 3.799 | -3.380 | 0.001 |
| hsa-miR-503-5p           | 4.767 | -4.230 | 0.049 |
| hsa-miR-744-3p           | 1.659 | -2.912 | 0.048 |
| hsa-miR-7975             | 1.133 | 3.393  | 0.024 |
| hsa-miR-7977             | 1.226 | 0.112  | 0.017 |
| ipu-miR-124a             | 4.574 | -1.234 | 0.001 |
| ipu-miR-7550             | 1.933 | 6.140  | 0.017 |
| isc-miR-124              | 4.574 | -1.234 | 0.001 |
| lgi-miR-124              | 4.574 | -1.234 | 0.001 |
| lla-miR-124a             | 4.844 | -0.794 | 0.001 |
| lva-miR-124-3p           | 4.574 | -1.234 | 0.001 |
| mdo-miR-124a-3p          | 4.844 | -0.794 | 0.001 |
| mdo-miR-146a-5p          | 2.455 | 2.187  | 0.008 |
| mdo-miR-34b-5p           | 3.387 | -1.380 | 0.025 |
| mdo-miR-34c-5p           | 3.493 | 1.219  | 0.023 |
| Metazoa-novel-1-mature   | 2.447 | 6.362  | 0.000 |
| Metazoa-novel-104-mature | 1.656 | -3.113 | 0.041 |
| Metazoa-novel-107-mature | 4.894 | 1.005  | 0.000 |
| Metazoa-novel-108-mature | 2.145 | -1.992 | 0.009 |
| Metazoa-novel-113-mature | 1.952 | -1.624 | 0.002 |
| Metazoa-novel-114-mature | 4.894 | 1.005  | 0.000 |
| Metazoa-novel-125-mature | 1.484 | -2.277 | 0.018 |
| Metazoa-novel-129-star   | 4.749 | -4.240 | 0.030 |
| Metazoa-novel-150-mature | 3.489 | -4.060 | 0.007 |
| Metazoa-novel-155-mature | 1.324 | 4.098  | 0.010 |
| Metazoa-novel-175-mature | 1.862 | 6.518  | 0.001 |
| Metazoa-novel-214-       | 1.106 | 7.065  | 0.010 |

|                          |       |        |       |
|--------------------------|-------|--------|-------|
| mature                   |       |        |       |
| Metazoa-novel-234-mature | 1.761 | 0.556  | 0.013 |
| Metazoa-novel-251-mature | 2.040 | -1.905 | 0.038 |
| Metazoa-novel-254-mature | 1.450 | -2.883 | 0.046 |
| Metazoa-novel-258-mature | 4.318 | -1.330 | 0.008 |
| Metazoa-novel-276-mature | 2.107 | -0.097 | 0.024 |
| Metazoa-novel-285-mature | 2.780 | -3.979 | 0.044 |
| Metazoa-novel-30-mature  | 3.238 | -3.833 | 0.024 |
| Metazoa-novel-30-star    | 3.544 | -3.607 | 0.014 |
| Metazoa-novel-300-mature | 1.929 | 1.898  | 0.000 |
| Metazoa-novel-307-mature | 1.144 | 8.190  | 0.002 |
| Metazoa-novel-310-mature | 2.471 | -1.075 | 0.013 |
| Metazoa-novel-313-mature | 1.457 | -0.213 | 0.037 |
| Metazoa-novel-318-mature | 2.690 | -0.404 | 0.000 |
| Metazoa-novel-320-mature | 1.143 | 8.199  | 0.002 |
| Metazoa-novel-322-mature | 3.501 | -2.703 | 0.000 |
| Metazoa-novel-327-mature | 1.254 | 8.903  | 0.001 |
| Metazoa-novel-331-mature | 1.144 | 8.191  | 0.002 |
| Metazoa-novel-343-mature | 2.726 | -4.341 | 0.042 |
| Metazoa-novel-345-mature | 1.550 | 2.167  | 0.040 |
| Metazoa-novel-354-mature | 1.116 | 4.763  | 0.010 |
| Metazoa-novel-359-mature | 2.726 | -4.341 | 0.042 |
| Metazoa-novel-362-mature | 1.148 | 3.420  | 0.022 |

|                          |       |        |       |
|--------------------------|-------|--------|-------|
| Metazoa-novel-391-mature | 1.111 | 5.244  | 0.006 |
| Metazoa-novel-411-mature | 1.680 | 0.821  | 0.018 |
| Metazoa-novel-417-mature | 1.481 | 3.766  | 0.005 |
| Metazoa-novel-419-mature | 1.144 | 8.193  | 0.002 |
| Metazoa-novel-58-mature  | 5.510 | -3.885 | 0.001 |
| Metazoa-novel-7-mature   | 1.486 | 1.275  | 0.012 |
| Metazoa-novel-72-mature  | 4.662 | -4.259 | 0.034 |
| Metazoa-novel-8-mature   | 1.569 | 1.615  | 0.005 |
| Metazoa-novel-99-mature  | 4.163 | -3.630 | 0.003 |
| mml-miR-124a-3p          | 4.844 | -0.794 | 0.001 |
| mml-miR-146a-5p          | 2.455 | 2.187  | 0.008 |
| mml-miR-21-3p            | 4.094 | -2.872 | 0.002 |
| mml-miR-34c-5p           | 3.493 | 1.219  | 0.023 |
| mml-miR-503-5p           | 4.767 | -4.230 | 0.049 |
| mmu-miR-124-3p           | 4.574 | -1.234 | 0.001 |
| mmu-miR-146a-5p          | 2.455 | 2.187  | 0.008 |
| mmu-miR-21a-3p           | 1.429 | 1.818  | 0.010 |
| mmu-miR-322-5p           | 2.174 | -2.821 | 0.045 |
| mmu-miR-34c-5p           | 3.493 | 1.219  | 0.023 |
| mmu-miR-3963             | 1.087 | 7.090  | 0.011 |
| mmu-miR-3968             | 1.101 | 4.872  | 0.012 |
| mmu-miR-5119             | 3.167 | -4.181 | 0.014 |
| mmu-miR-744-3p           | 1.659 | -2.912 | 0.048 |
| mse-miR-124              | 4.574 | -1.234 | 0.001 |
| mse-miR-2779             | 1.933 | 6.141  | 0.017 |
| nvi-miR-124              | 4.574 | -1.234 | 0.001 |
| oan-miR-124a-1-3p        | 4.574 | -1.234 | 0.001 |
| oan-miR-133c             | 4.597 | -4.307 | 0.014 |
| oan-miR-1386             | 1.303 | 6.736  | 0.018 |
| oan-miR-21-3p            | 1.429 | 1.818  | 0.010 |
| oan-miR-34a-5p           | 3.493 | 1.219  | 0.023 |
| oan-miR-34b-5p           | 3.215 | -1.614 | 0.025 |
| odi-miR-124a             | 4.934 | -1.293 | 0.002 |
| oha-miR-124              | 4.574 | -1.234 | 0.001 |
| oha-miR-124-3p           | 4.574 | -1.234 | 0.001 |

|                  |       |        |       |
|------------------|-------|--------|-------|
| oha-miR-124-4-3p | 4.934 | -1.293 | 0.002 |
| oha-miR-34c-5p   | 3.387 | -1.380 | 0.025 |
| ola-miR-124-3p   | 4.574 | -1.234 | 0.001 |
| pma-miR-124-3p   | 4.574 | -1.234 | 0.001 |
| pmi-miR-124-3p   | 4.574 | -1.234 | 0.001 |
| pol-miR-124-3p   | 4.574 | -1.234 | 0.001 |
| ppa-miR-124a     | 4.844 | -0.794 | 0.001 |
| ppc-miR-124      | 4.574 | -1.234 | 0.001 |
| ppy-miR-124      | 4.574 | -1.234 | 0.001 |
| ppy-miR-124a     | 4.844 | -0.794 | 0.001 |
| ppy-miR-146a     | 2.455 | 2.187  | 0.008 |
| ppy-miR-34c-5p   | 3.493 | 1.219  | 0.023 |
| ppy-miR-503      | 4.767 | -4.230 | 0.049 |
| prd-miR-124-3p   | 4.574 | -1.234 | 0.001 |
| ptr-miR-124a     | 4.844 | -0.794 | 0.001 |
| ptr-miR-146a     | 2.455 | 2.187  | 0.008 |
| ptr-miR-503      | 4.767 | -4.230 | 0.049 |
| rno-miR-124-3p   | 4.574 | -1.234 | 0.001 |
| rno-miR-146a-5p  | 2.455 | 2.187  | 0.008 |
| rno-miR-21-3p    | 1.429 | 1.818  | 0.010 |
| rno-miR-322-5p   | 2.174 | -2.821 | 0.045 |
| rno-miR-34c-5p   | 3.493 | 1.219  | 0.023 |
| sko-miR-124-3p   | 4.574 | -1.234 | 0.001 |
| sme-miR-124a-3p  | 4.458 | -1.732 | 0.004 |
| sme-miR-124b-3p  | 4.458 | -1.732 | 0.004 |
| sme-miR-124c-3p  | 4.574 | -1.234 | 0.001 |
| spu-miR-124      | 4.574 | -1.234 | 0.001 |
| ssc-miR-124a     | 4.574 | -1.234 | 0.001 |
| ssc-miR-146a-5p  | 2.455 | 2.187  | 0.008 |
| ssc-miR-34c      | 3.493 | 1.219  | 0.023 |
| str-miR-124-3p   | 4.574 | -1.234 | 0.001 |
| tca-miR-124-3p   | 4.574 | -1.234 | 0.001 |
| tch-miR-146a-5p  | 2.455 | 2.187  | 0.008 |
| tch-miR-34c-5p   | 3.493 | 1.219  | 0.023 |
| tgu-miR-124-3p   | 4.574 | -1.234 | 0.001 |
| tgu-miR-146c     | 2.455 | 2.187  | 0.008 |
| tgu-miR-34b      | 3.493 | 1.219  | 0.023 |
| tgu-miR-34c-5p   | 3.387 | -1.380 | 0.025 |
| tni-miR-124      | 4.574 | -1.234 | 0.001 |
| tur-miR-124-3p   | 4.574 | -1.234 | 0.001 |
| xbo-miR-124      | 4.574 | -1.234 | 0.001 |
| xtr-miR-124      | 4.844 | -0.794 | 0.001 |
| xtr-miR-34b      | 3.375 | -1.478 | 0.019 |

**Down**

|                 |        |        |       |
|-----------------|--------|--------|-------|
| aac-miR-184     | -1.593 | -0.003 | 0.001 |
| aca-miR-184-3p  | -1.552 | 1.521  | 0.002 |
| aca-miR-200a-3p | -1.546 | -2.375 | 0.016 |
| aga-miR-184     | -1.593 | -0.003 | 0.001 |
| ame-miR-184     | -1.593 | -0.003 | 0.001 |
| api-miR-184a    | -1.593 | -0.003 | 0.001 |
| bbe-miR-184-3p  | -1.593 | -0.003 | 0.001 |
| bfl-miR-184-3p  | -1.593 | -0.003 | 0.001 |
| bmo-miR-184-3p  | -1.593 | -0.003 | 0.001 |
| bta-miR-184     | -1.552 | 1.521  | 0.002 |
| bta-miR-200a    | -1.546 | -2.375 | 0.016 |
| bta-miR-3613a   | -2.155 | -2.365 | 0.003 |
| bta-miR-369-3p  | -1.007 | 2.041  | 0.007 |
| bta-miR-376e    | -1.501 | -0.927 | 0.003 |
| bta-miR-487a    | -2.830 | -3.755 | 0.033 |
| bta-miR-6123    | -2.370 | -1.090 | 0.000 |
| ccr-miR-184     | -1.593 | -0.003 | 0.001 |
| ccr-miR-200a    | -1.546 | -2.375 | 0.016 |
| cfa-miR-184     | -1.552 | 1.521  | 0.002 |
| cfa-miR-487a    | -2.830 | -3.755 | 0.033 |
| cgr-miR-184     | -1.552 | 1.521  | 0.002 |
| cgr-miR-369-3p  | -1.007 | 2.041  | 0.007 |
| chi-miR-184     | -1.552 | 1.521  | 0.002 |
| chi-miR-200a    | -1.546 | -2.375 | 0.016 |
| chi-miR-369-3p  | -1.007 | 2.041  | 0.007 |
| chi-miR-376e-3p | -1.501 | -0.927 | 0.003 |
| chi-miR-487a-3p | -2.830 | -3.755 | 0.033 |
| cin-miR-184     | -1.593 | -0.003 | 0.001 |
| cqu-miR-184     | -1.593 | -0.003 | 0.001 |
| cte-miR-184a    | -1.593 | -0.003 | 0.001 |
| dan-miR-184-3p  | -1.593 | -0.003 | 0.001 |
| der-miR-184-3p  | -1.593 | -0.003 | 0.001 |
| dgr-miR-184-3p  | -1.593 | -0.003 | 0.001 |
| dme-miR-184-3p  | -1.593 | -0.003 | 0.001 |
| dmo-miR-184-3p  | -1.593 | -0.003 | 0.001 |
| dpe-miR-184-3p  | -1.593 | -0.003 | 0.001 |
| dps-miR-184     | -1.593 | -0.003 | 0.001 |
| dre-miR-184     | -1.593 | -0.003 | 0.001 |
| dre-miR-200a-3p | -1.546 | -2.375 | 0.016 |
| dse-miR-184-3p  | -1.593 | -0.003 | 0.001 |
| dsi-miR-184-3p  | -1.593 | -0.003 | 0.001 |
| dvi-miR-184-3p  | -1.593 | -0.003 | 0.001 |
| dwi-miR-184-3p  | -1.593 | -0.003 | 0.001 |
| dya-miR-184-3p  | -1.593 | -0.003 | 0.001 |

|                          |        |        |       |
|--------------------------|--------|--------|-------|
| eca-miR-184              | -1.552 | 1.521  | 0.002 |
| eca-miR-200a             | -1.546 | -2.375 | 0.016 |
| eca-miR-369-3p           | -1.007 | 2.041  | 0.007 |
| eca-miR-487a             | -2.830 | -3.755 | 0.033 |
| efu-miR-200a             | -1.546 | -2.375 | 0.016 |
| fru-miR-184              | -1.593 | -0.003 | 0.001 |
| fru-miR-200a             | -1.546 | -2.375 | 0.016 |
| gga-miR-184-3p           | -1.552 | 1.521  | 0.002 |
| gga-miR-200a-3p          | -1.546 | -2.375 | 0.016 |
| ggo-miR-200a             | -1.546 | -2.375 | 0.016 |
| ggo-miR-487a             | -2.830 | -3.755 | 0.033 |
| hme-miR-184              | -1.593 | -0.003 | 0.001 |
| hsa-miR-184              | -1.552 | 1.521  | 0.002 |
| hsa-miR-200a-3p          | -1.546 | -2.375 | 0.016 |
| hsa-miR-3613-5p          | -2.155 | -2.365 | 0.003 |
| hsa-miR-369-3p           | -1.007 | 2.041  | 0.007 |
| hsa-miR-487a-3p          | -2.830 | -3.755 | 0.033 |
| ipu-miR-141              | -1.546 | -2.375 | 0.016 |
| ipu-miR-184              | -1.593 | -0.003 | 0.001 |
| ipu-miR-200a             | -1.546 | -2.375 | 0.016 |
| isc-miR-184              | -1.593 | -0.003 | 0.001 |
| lgi-miR-184              | -1.593 | -0.003 | 0.001 |
| lva-miR-184-3p           | -1.593 | -0.003 | 0.001 |
| mdo-miR-184-3p           | -1.552 | 1.521  | 0.002 |
| mdo-miR-200a-3p          | -1.546 | -2.375 | 0.016 |
| Metazoa-novel-110-mature | -4.494 | -4.124 | 0.023 |
| Metazoa-novel-117-mature | -4.482 | -4.113 | 0.041 |
| Metazoa-novel-118-mature | -4.482 | -4.113 | 0.041 |
| Metazoa-novel-139-mature | -5.142 | -3.822 | 0.017 |
| Metazoa-novel-277-mature | -1.512 | -2.519 | 0.026 |
| Metazoa-novel-302-mature | -1.162 | -1.862 | 0.040 |
| mml-miR-184              | -1.552 | 1.521  | 0.002 |
| mml-miR-200a-3p          | -1.546 | -2.375 | 0.016 |
| mml-miR-369-3p           | -1.007 | 2.041  | 0.007 |
| mml-miR-487a             | -2.830 | -3.755 | 0.033 |
| mmu-miR-106a-5p          | -2.709 | -2.541 | 0.005 |
| mmu-miR-184-3p           | -1.552 | 1.521  | 0.002 |
| mmu-miR-200a-3p          | -1.546 | -2.375 | 0.016 |

|                 |        |        |       |
|-----------------|--------|--------|-------|
| mmu-miR-369-3p  | -1.007 | 2.041  | 0.007 |
| mmu-miR-6402    | -2.832 | -3.773 | 0.011 |
| mne-miR-184     | -1.552 | 1.521  | 0.002 |
| mse-miR-184     | -1.593 | -0.003 | 0.001 |
| ngi-miR-184     | -1.593 | -0.003 | 0.001 |
| nlo-miR-184     | -1.593 | -0.003 | 0.001 |
| nvi-miR-184     | -1.593 | -0.003 | 0.001 |
| oan-miR-200a-3p | -1.546 | -2.375 | 0.016 |
| oan-miR-23b-3p  | -1.197 | 1.426  | 0.011 |
| oar-miR-200a    | -1.546 | -2.375 | 0.016 |
| oar-miR-369-3p  | -1.007 | 2.041  | 0.007 |
| oar-miR-376e-3p | -1.501 | -0.927 | 0.003 |
| oar-miR-487a-3p | -2.830 | -3.755 | 0.033 |
| odi-miR-1c      | -1.384 | 0.144  | 0.027 |
| oha-miR-200a    | -1.546 | -2.375 | 0.016 |
| ola-miR-184-3p  | -1.593 | -0.003 | 0.001 |
| ola-miR-200a    | -1.546 | -2.375 | 0.016 |
| pmi-miR-184-3p  | -1.593 | -0.003 | 0.001 |
| ppy-miR-184     | -1.552 | 1.521  | 0.002 |
| ppy-miR-200a    | -1.546 | -2.375 | 0.016 |
| ppy-miR-369-3p  | -1.007 | 2.041  | 0.007 |
| ppy-miR-487a    | -2.830 | -3.755 | 0.033 |
| ptr-miR-184     | -1.552 | 1.521  | 0.002 |
| ptr-miR-200a    | -1.546 | -2.375 | 0.016 |
| ptr-miR-369     | -1.007 | 2.041  | 0.007 |
| ptr-miR-487a    | -2.830 | -3.755 | 0.033 |
| rno-miR-184     | -1.552 | 1.521  | 0.002 |
| rno-miR-200a-3p | -1.546 | -2.375 | 0.016 |
| rno-miR-369-3p  | -1.007 | 2.041  | 0.007 |
| sha-miR-200a    | -1.546 | -2.375 | 0.016 |
| sko-miR-184-3p  | -1.593 | -0.003 | 0.001 |
| spu-miR-184     | -1.593 | -0.003 | 0.001 |
| ssa-miR-200b-3p | -1.546 | -2.375 | 0.016 |
| ssc-miR-184     | -1.552 | 1.521  | 0.002 |
| ssc-miR-3613    | -2.155 | -2.365 | 0.003 |
| ssc-miR-369     | -1.007 | 2.041  | 0.007 |
| str-miR-92-3p   | -5.088 | -3.823 | 0.002 |
| tca-miR-184-3p  | -1.593 | -0.003 | 0.001 |
| tca-miR-92a-3p  | -1.799 | -1.300 | 0.005 |
| tch-miR-184     | -1.552 | 1.521  | 0.002 |
| tch-miR-200a-3p | -1.546 | -2.375 | 0.016 |
| tch-miR-369-3p  | -1.007 | 2.041  | 0.007 |
| tgu-miR-184     | -1.552 | 1.521  | 0.002 |
| tgu-miR-200a-3p | -1.546 | -2.375 | 0.016 |

|                |        |        |       |
|----------------|--------|--------|-------|
| tni-miR-184    | -1.593 | -0.003 | 0.001 |
| tni-miR-200a   | -1.546 | -2.375 | 0.016 |
| tur-miR-184-3p | -1.593 | -0.003 | 0.001 |
| xtr-miR-184    | -1.862 | -0.723 | 0.000 |
| xtr-miR-200a   | -1.546 | -2.375 | 0.016 |

---

<sup>1</sup>id: Mature miRNA id.

<sup>2</sup>logFoldChange: Differential multiple log2 conversion value.

<sup>3</sup>log2CPM: count-per-million log2 conversion value.



**Table S15.** Gene functions of 30 significantly enriched differential miRNAs targeting mRNA in the MHB group.

| GO.ID      | Term                                                                 | Qntology           | GeneRatio <sup>1</sup> | BgRatio <sup>2</sup> | p-Value |
|------------|----------------------------------------------------------------------|--------------------|------------------------|----------------------|---------|
| GO:0045944 | positive regulation of transcription from RNA polymerase II promoter | biological process | 202/3535               | 775/27054            | 0.000   |
| GO:0000122 | negative regulation of transcription from RNA polymerase II promoter | biological process | 150/3535               | 533/27054            | 0.000   |
| GO:0006355 | regulation of transcription, DNA-templated                           | biological process | 243/3535               | 1051/27054           | 0.000   |
| GO:0045893 | positive regulation of transcription, DNA-templated                  | biological process | 114/3535               | 448/27054            | 0.000   |
| GO:0008285 | negative regulation of cell proliferation                            | biological process | 72/3535                | 237/27054            | 0.000   |
| GO:0006468 | protein phosphorylation                                              | biological process | 131/3535               | 579/27054            | 0.000   |
| GO:0007156 | homophilic cell adhesion via plasma membrane adhesion molecules      | biological process | 36/3535                | 90/27054             | 0.000   |
| GO:0045892 | negative regulation of transcription, DNA-templated                  | biological process | 90/3535                | 360/27054            | 0.000   |
| GO:0001701 | in utero embryonic development                                       | biological process | 58/3535                | 194/27054            | 0.000   |
| GO:0007155 | cell adhesion                                                        | biological process | 65/3535                | 237/27054            | 0.000   |
| GO:0005634 | nucleus                                                              | cellular component | 688/3535               | 3186/27054           | 0.000   |
| GO:0005654 | nucleoplasm                                                          | cellular component | 498/3535               | 2246/27054           | 0.000   |
| GO:0005829 | cytosol                                                              | cellular component | 473/3535               | 2176/27054           | 0.000   |
| GO:0005737 | cytoplasm                                                            | cellular component | 526/3535               | 2612/27054           | 0.000   |
| GO:0005886 | plasma membrane                                                      | cellular component | 441/3535               | 2418/27054           | 0.000   |
| GO:0016020 | membrane                                                             | cellular component | 903/3535               | 5691/27054           | 0.000   |
| GO:0014069 | postsynaptic density                                                 | cellular component | 39/3535                | 103/27054            | 0.000   |
| GO:0005794 | Golgi apparatus                                                      | cellular component | 145/3535               | 682/27054            | 0.000   |

|            |                                                                                                                 |                    |          |            |       |
|------------|-----------------------------------------------------------------------------------------------------------------|--------------------|----------|------------|-------|
| GO:0005623 | cell                                                                                                            | cellular component | 130/3535 | 598/27054  | 0.000 |
| GO:0043231 | intracellular membrane-bounded organelle                                                                        | cellular component | 117/3535 | 525/27054  | 0.000 |
| GO:0005515 | protein binding                                                                                                 | molecular function | 691/3535 | 2880/27054 | 0.000 |
| GO:0003677 | DNA binding                                                                                                     | molecular function | 288/3535 | 1122/27054 | 0.000 |
| GO:0005524 | ATP binding                                                                                                     | molecular function | 312/3535 | 1328/27054 | 0.000 |
| GO:0000978 | RNA polymerase II core promoter proximal region sequence-specific DNA binding                                   | molecular function | 117/3535 | 380/27054  | 0.000 |
| GO:0003700 | transcription factor activity, sequence-specific DNA binding                                                    | molecular function | 153/3535 | 573/27054  | 0.000 |
| GO:0043565 | sequence-specific DNA binding                                                                                   | molecular function | 124/3535 | 444/27054  | 0.000 |
| GO:0000166 | nucleotide binding                                                                                              | molecular function | 225/3535 | 1042/27054 | 0.000 |
| GO:0046872 | metal ion binding                                                                                               | molecular function | 282/3535 | 1462/27054 | 0.000 |
| GO:0042802 | identical protein binding                                                                                       | molecular function | 190/3535 | 897/27054  | 0.000 |
| GO:0001227 | transcriptional repressor activity, RNA polymerase II transcription regulatory region sequence-specific binding | molecular function | 49/3535  | 148/27054  | 0.000 |

---

<sup>1</sup> GeneRatio: The number of target genes in this GO entry/the number of genes with GO annotations in the target gene.

<sup>2</sup> BgRatio: The number of genes in the GO entry of this entry/the number of genes with GO annotations in all genes.
